# Supplementary material
Source: PubMed Central journal article supplement (PMC7880412)
Supplement: jci-131-140242-s167.pdf [file jci-131-140242-s167.pdf]

Figure S1

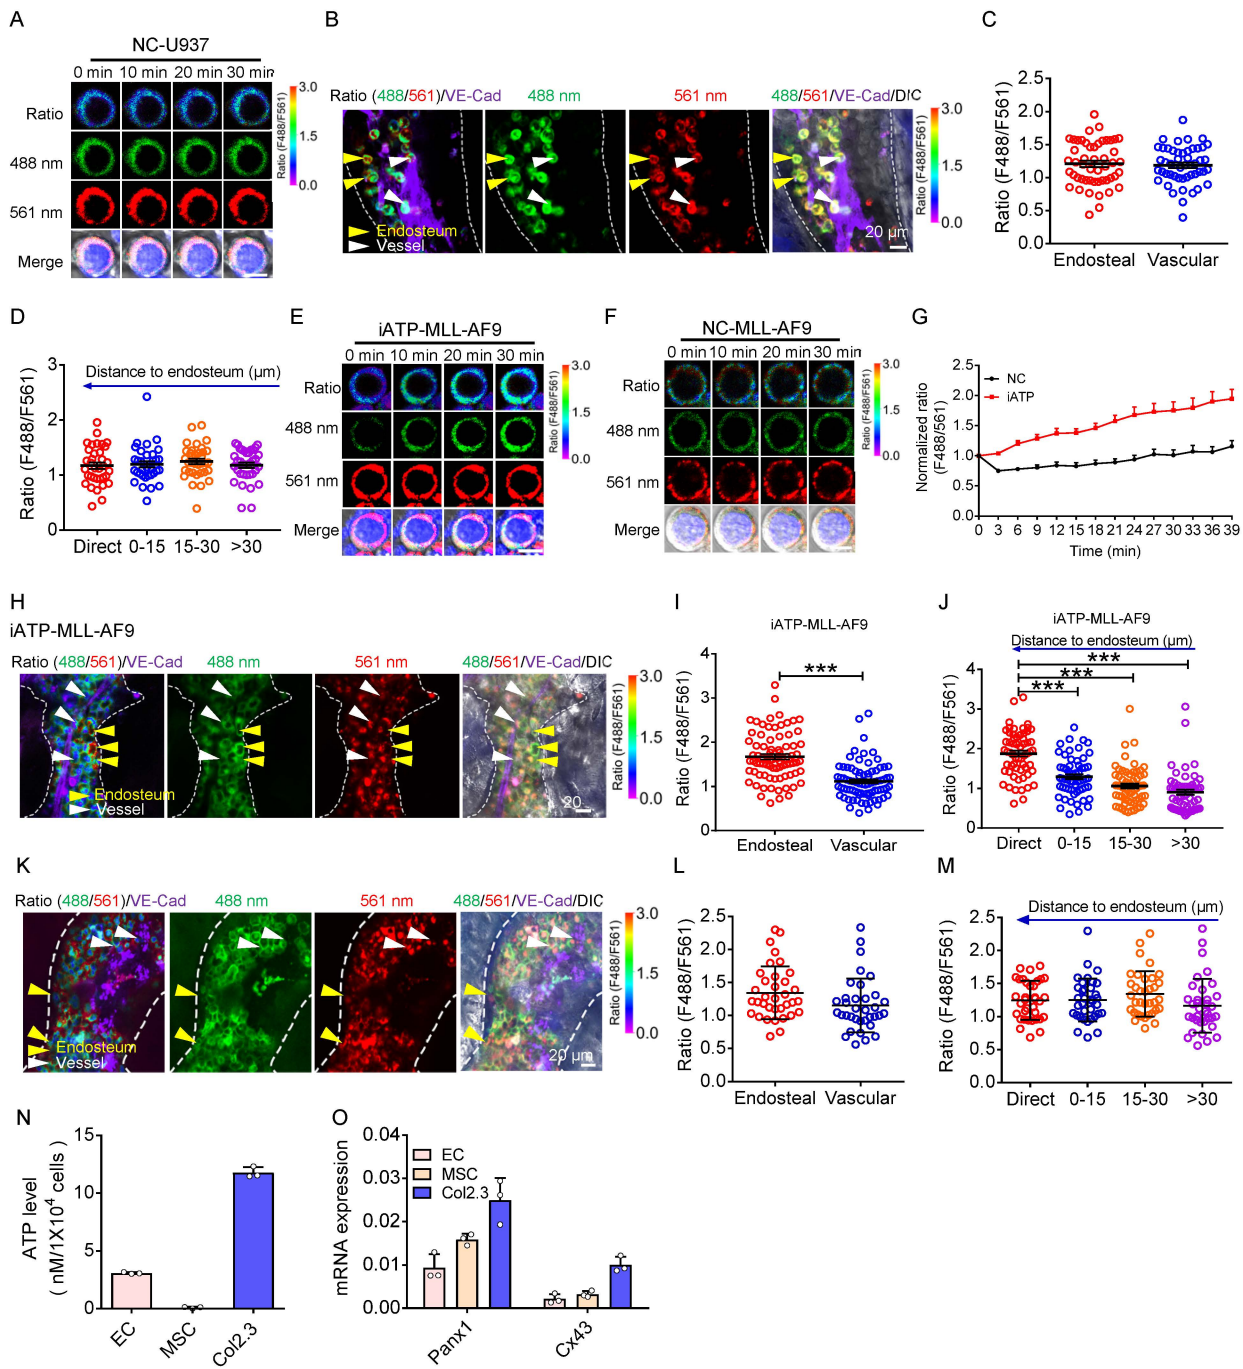

1011 **Figure S1, related to Figure 1. The endosteal niche has a much higher ATP level**  
1012 **than the vascular niche.** A) Representative images of the control sensor (mCherry-  
1013 cpSFGFP, NC) fluorescence ratio at excitation wavelengths of 488 nm and 561 nm  
1014 (F488/F561 nm) in NC-U937 cells at the indicated time points upon the ATP  
1015 stimulation. B) Representative images of the localization of NC-U937 cells expressing  
1016 the control sensor in the endosteal niche (dashed lines) or the vascular niche and their  
1017 ratios of fluorescence (488/561 nm) are shown. C) Quantification of the fluorescence  
1018 ratio of the control sensor in panel B (n=approximately 50 cells/group from 3 biological  
1019 replicates). D) Quantification of the fluorescence ratio of NC-U937 cells expressing the  
1020 control sensor and their relationships to the distance to the endosteum in panel B  
1021 (n=approximately 35 cells/group from 3 biological replicates). E-F) Representative  
1022 images of iATPSnFR (E) and the control sensor (F) fluorescence ratio at excitation  
1023 wavelengths of 488 nm and 561 nm (F488/F561 nm) in MLL-AF9<sup>+</sup> murine AML cells  
1024 at the indicated time points upon ATP stimulation. G) Quantification of the  
1025 fluorescence ratio of the iATPSnFR and control sensor in murine AML cells (n=25  
1026 cells/group). H) Representative images of the localization of iATPSnFR-AML cells in  
1027 the endosteal niche (dashed lines) and the vascular niche and their fluorescence ratios.  
1028 Scale bar, 10  $\mu$ m. I) Quantification of the iATPSnFR fluorescence ratio in murine  
1029 iATPSnFR-AML cells in the endosteal and the vascular niche in panel H  
1030 (n=approximately 80 cells/group from 4 biological replicates, \*\*\*P<0.001, one-way  
1031 ANOVA with Tukey's multiple comparison test). J) Quantification of the iATPSnFR  
1032 fluorescence ratio in murine iATPSnFR-AML cells and their relationships to the

1033 distance to the endosteum in panel H (n=approximately 60 cells/group from 4 biological  
1034 replicates, \*\*\*P<0.001, one-way ANOVA with Tukey's multiple comparison test). K)  
1035 Representative images of the localization of MLL-AF9<sup>+</sup> murine AML cells expressing  
1036 the control sensor in the endosteal niche (dashed lines) or the vascular niche and their  
1037 ratios of fluorescence (488/561 nm) are shown. Scale bar, 10 μm. L) Quantification of  
1038 the fluorescence ratio of the control sensor in panel K (n=approximately 50 cells/group  
1039 from 3 biological replicates). M) Quantification of the fluorescence ratio of MLL-AF9<sup>+</sup>  
1040 murine AML cells expressing the control sensor and their relationships to the distance  
1041 to the endosteum in panel K (n=approximately 35 cells/group from 3 biological  
1042 replicates). N) The ATP levels were determined in the supernatant of several key types  
1043 of niche cells in the BM, including CD31<sup>-</sup>CD45<sup>-</sup>Ter119<sup>-</sup>Lepr<sup>+</sup> mesenchymal stem cells  
1044 (MSC), CD31<sup>+</sup>CD45<sup>-</sup>Ter119<sup>-</sup> endothelial cells (EC) and Col2.3<sup>+</sup> osteoblasts (Col2.3),  
1045 24 h after culture in vitro. O) The mRNA levels of Panx1 and Cx43 were measured in  
1046 several niche cells, including CD31<sup>-</sup>CD45<sup>-</sup>Ter119<sup>-</sup>Lepr<sup>+</sup> mesenchymal stem cells  
1047 (MSC), CD31<sup>+</sup>CD45<sup>-</sup>Ter119<sup>-</sup> endothelial cells (EC) and Col2.3<sup>+</sup> osteoblasts (Col2.3),  
1048 by quantitative RT-PCR (n=3).

Figure S2

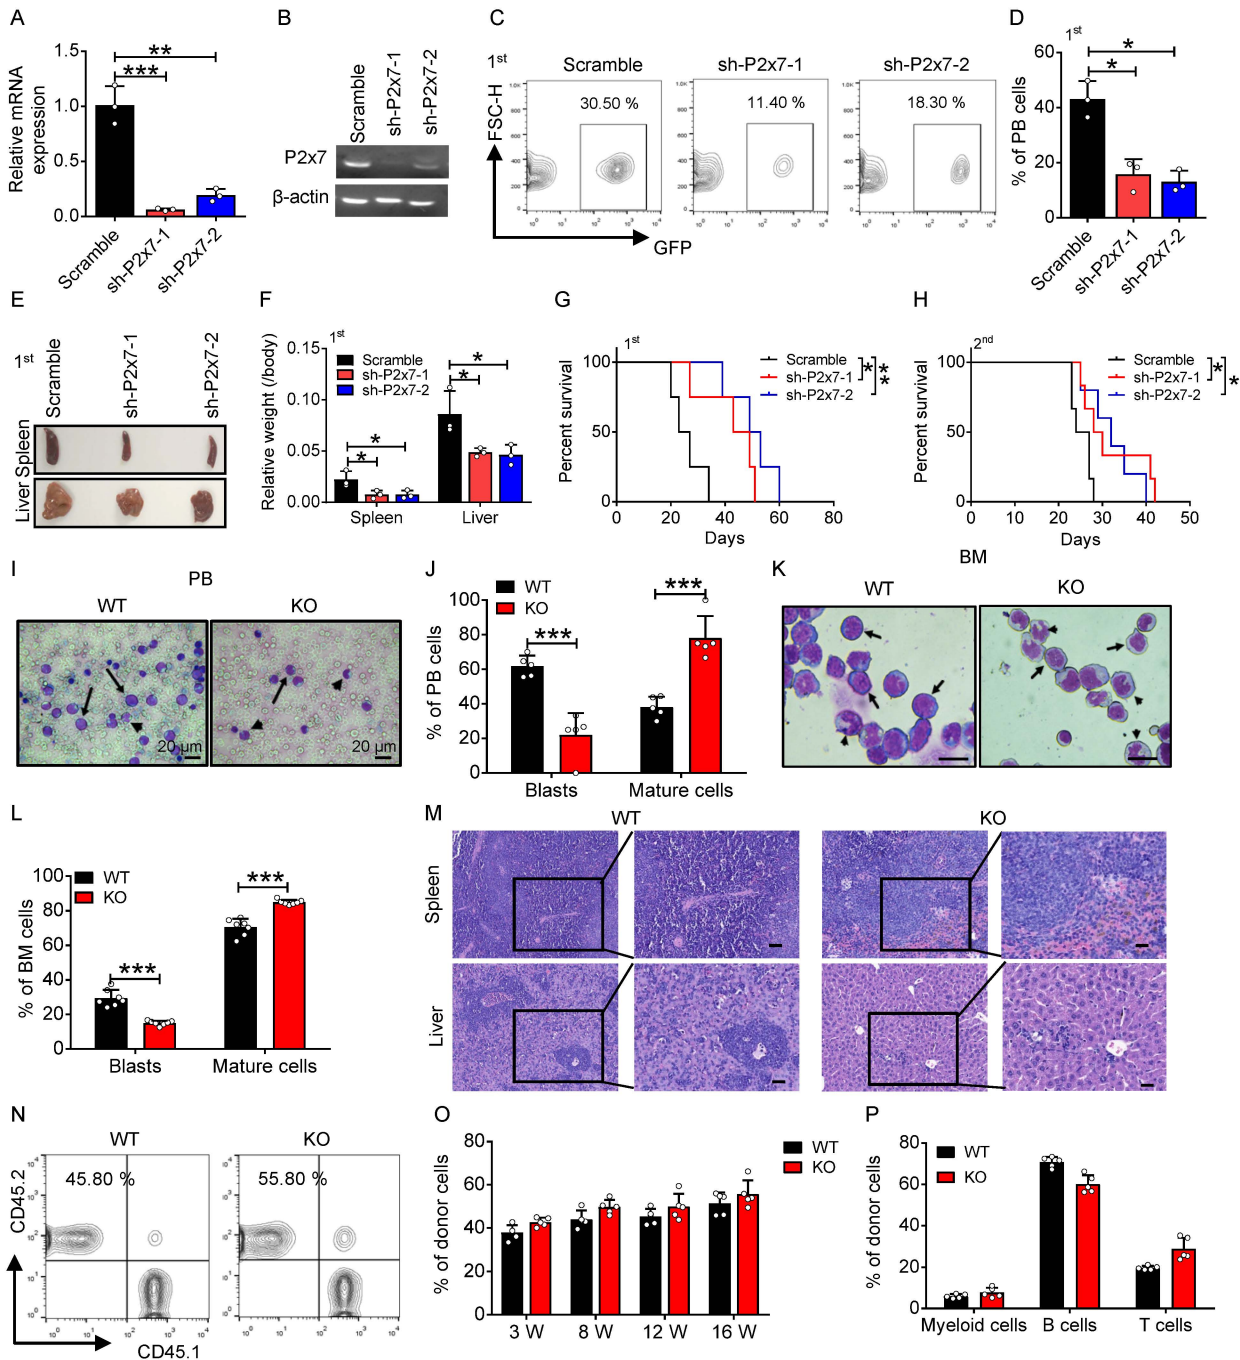

1049 **Figure S2, related to Figure 2. P2X7 is highly expressed in LICs and promotes**  
1050 **AML development.** A-B) The knockdown efficiency of shRNAs (sh-P2x7-1 and -2)  
1051 targeting murine P2x1 was determined by quantitative RT-PCR (A, n=3).  
1052 Representative electrophoresis images of the RT-PCR products are shown (B). C)  
1053 Representative flow cytometric analysis of GFP<sup>+</sup> AML cells in the peripheral blood of  
1054 recipient mice receiving the transplants of P2x7-knockdown MLL-AF9<sup>+</sup> BM cells or  
1055 the scrambled control upon primary transplantation. D) Quantification of the  
1056 frequency of the AML cells in panel C (n=5; \*, P<0.05; one-way ANOVA with  
1057 Tukey's multiple comparison test). E-F) Representative images of the size of the  
1058 spleens and livers of recipient mice in panel C (E) and quantification of the weight of  
1059 spleens and livers are shown (F, n=3; \*\*\*, P<0.001; two-way ANOVA with Sidak's  
1060 multiple comparison test). G-H) The overall survival of the recipient mice transplanted  
1061 with the P2x7-knockdown MLL-AF9<sup>+</sup> BM cells or the scrambled control upon primary  
1062 (G) and secondary transplantation (H) (n=5; \*, P<0.05, \*\*, P<0.01; log-rank test). I)  
1063 Representative images of the Giemsa-Wright staining for WT and P2x7-KO AML  
1064 cells in the peripheral blood upon secondary transplantation. J) Quantification of the  
1065 frequency of the blast cells in panel I (n=5-6; \*\*\*, P<0.001; two-way ANOVA with  
1066 Sidak's multiple comparison test). K) Representative images of the Giemsa-Wright  
1067 staining for WT and P2x7-KO AML cells in the BM upon 21 days after transplantation.  
1068 L) Quantification of the frequency of the blast cells in panel K (n=5-6; \*\*\*, P<0.001;  
1069 two-way ANOVA with Sidak's multiple comparison test). M) Histological HE  
1070 staining of the livers and spleens of the recipients transplanted with WT and P2x7-KO

1071 AML cells upon primary transplantation. N-O) Representative flow cytometric  
1072 analysis of donor cells (CD45.2) in the peripheral blood of recipient mice upon the  
1073 competitive BM transplantation is shown (N). The frequency WT and P2x7-KO donor  
1074 cells was evaluated 3, 8, 12 and 16 weeks after transplantation (O). P) Multilineages  
1075 of donor cells in the recipient mice transplanted with WT and P2x7-KO normal BM  
1076 cells 16 weeks post-transplantation (n=5). Scale bar, 20  $\mu$ m.

Figure S3

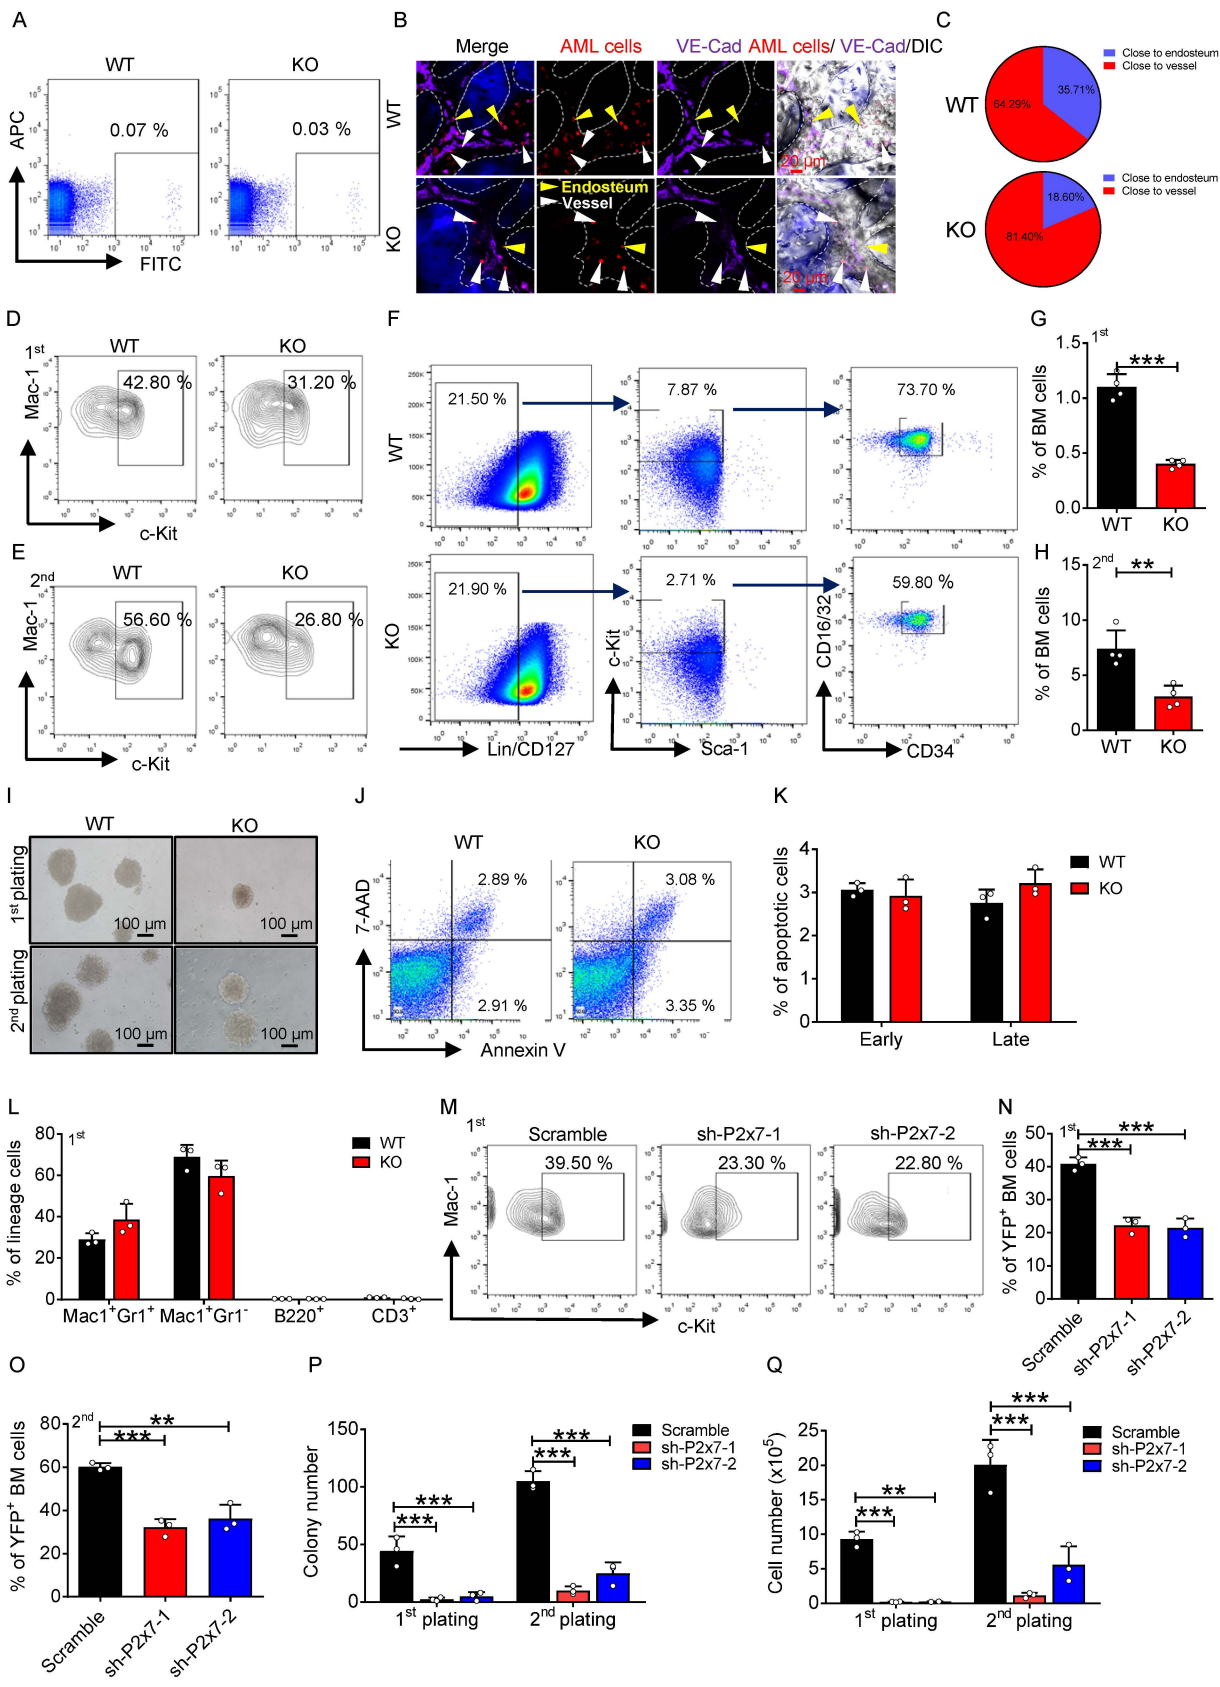

1077 **Figure S3, related to Figure 3. ATP-P2X7 signaling maintains the homing and self-**  
1078 **renewal abilities of LICs.** A) Representative flow cytometric analysis for CFSE-  
1079 labeled WT and P2x7-KO leukemia cells in the BM of the recipients 16 h after  
1080 transplantation. B) Representative images of the localizations of AML cells (red) in BM  
1081 niches. The vascular niche (vessel) was labeled with the anti-VE-Cadherin antibody  
1082 (purple) and the endosteal niche (endosteum) was indicated by the dashed lines. C)  
1083 Percentages of AML cells attached to the endosteal niche or the vascular niche in panel  
1084 B were calculated (n=approximately 43 cells/group from 3 biological replicates). D-E)  
1085 Representative flow cytometric analysis for WT and P2x7-KO Mac-1<sup>+</sup>c-Kit<sup>+</sup>LICs of  
1086 the recipients upon primary (D) and secondary (E) transplantation. F) Representative  
1087 flow cytometric analysis for WT and KO L-GMPs (Lin<sup>-</sup>Sca-1<sup>+</sup>c-  
1088 Kit<sup>+</sup>CD34<sup>+</sup>CD16/CD32<sup>+</sup>) of the recipients upon primary transplantation. G-H)  
1089 Quantification of the frequency of L-GMPs of the recipients in panel F upon primary  
1090 (G) and secondary transplantation (H) (n=4; \*\*, P<0.01, \*\*\*, P<0.001; Student's t test).  
1091 I) Representative images of colony formation of WT and P2x7-KO YFP<sup>+</sup> AML cells  
1092 during the 1<sup>st</sup> and 2<sup>nd</sup> plating. J) Representative flow cytometric analysis of apoptosis  
1093 of WT or P2x7-KO Mac-1<sup>+</sup>c-Kit<sup>+</sup> LICs. K) Quantification of data in panel J (n=3). L)  
1094 Quantitative results of the differentiation status of BM cells in the recipient mice as  
1095 determined with myeloid cell markers (Mac-1/Gr-1), B cell markers (B220) and T cell  
1096 markers (CD3e) upon primary transplantation (n=5). M) Representative flow  
1097 cytometric analysis for the Mac-1<sup>+</sup>c-Kit<sup>+</sup> LICs upon the P2x7 knockdown (sh-P2x7-1  
1098 and -2) from the recipients upon primary transplantation. N-O) Quantification of the



1099 frequency of LICs in BM of the recipients in panel M upon primary (N) and secondary  
1100 (O) transplantation (n=3; \*\*, P<0.01, \*\*\*, P<0.001; one-way ANOVA with Tukey's  
1101 multiple comparison test). P-Q) The colony numbers (P) and derived total cell counts  
1102 (Q) of the AML cells upon the P2x7 knockdown (sh-P2x7-1 and -2) during the 1<sup>st</sup> and  
1103 2<sup>nd</sup> plating (n=3; \*\*, P<0.01, \*\*\*, P<0.001; two-way ANOVA with Sidak's multiple  
1104 comparison test).

Figure S4

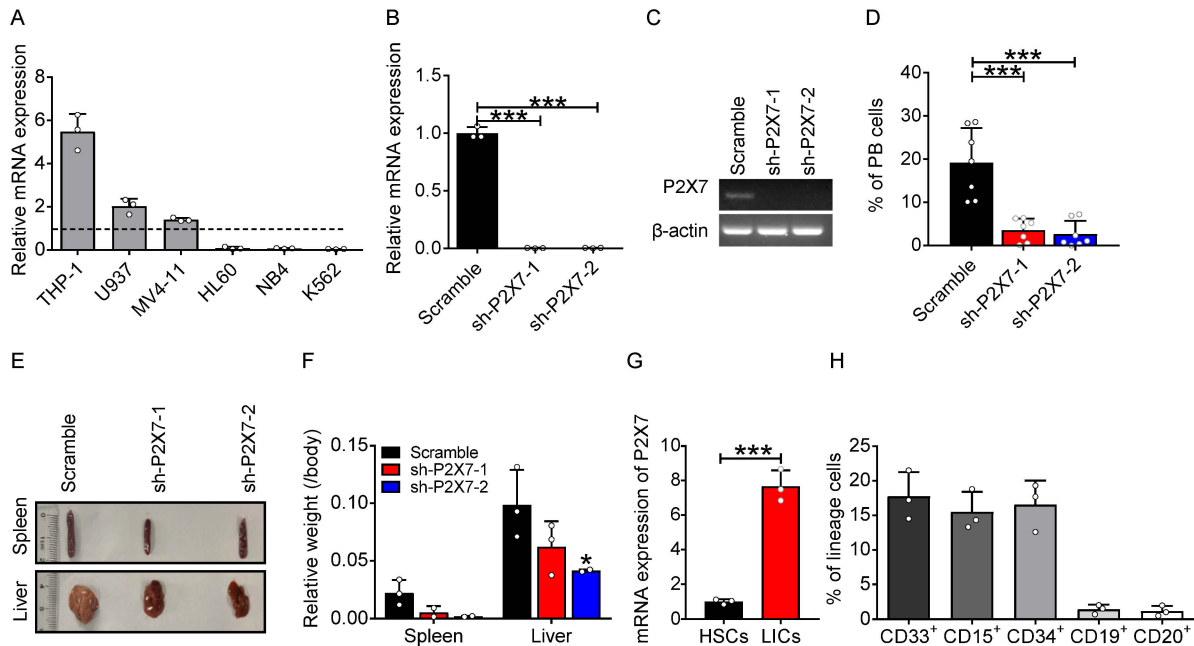

1105 **Figure S4, related to Figure 4. P2X7 is required for the proliferation of human**  
1106 **AML cells.** A) The mRNA levels of P2X7 in THP-1, U937, MV4-11, HL60, NB4 and  
1107 K562 cells was measured by quantitative RT-PCR (n=3). B-C) The knockdown  
1108 efficiency of P2X7 was measured in THP-1 cells targeted by the shRNAs (sh-P2X7-1  
1109 and -2) by quantitative RT-PCR (n=3; \*\*\*, P<0.001; one-way ANOVA with Tukey's  
1110 multiple comparison test). Representative electrophoresis images of RT-PCR products  
1111 are shown in panel C. D) Quantification of the frequency of the AML cells in the  
1112 peripheral blood of recipient mice receiving the transplants of P2X7-knockdown THP-  
1113 1 cells or the scrambled control upon transplantation. (n=7; \*\*\*, P<0.001; one-way  
1114 ANOVA with Tukey's multiple comparison test). E) Representative images of the  
1115 spleens and livers of the recipient mice transplanted with THP-1 cells infected with  
1116 shRNAs targeting P2X7 (sh-P2X7-1 and -2) and the scrambled controls. F)  
1117 Quantification of the weight of spleens and livers in panel E (n=3; \*, P<0.05; two-way  
1118 ANOVA with Sidak's multiple comparison test). G) The mRNA levels of P2X7 in  
1119 human  $\text{Lin}^- \text{CD34}^+ \text{CD38}^- \text{CD90}^+ \text{CD45RA}^-$  HSCs and  $\text{Lin}^- \text{CD34}^+ \text{CD38}^- \text{CD90}^-$   
1120  $\text{CD45RA}^+$  LICs were measured by quantitative RT-PCR (n=3; \*\*\*, P<0.001;  
1121 Student's t test). H) The frequency of lineage cells in NOD-SCID mice transplanted  
1122 with the patient's AML cells (AML #1).

Figure S5

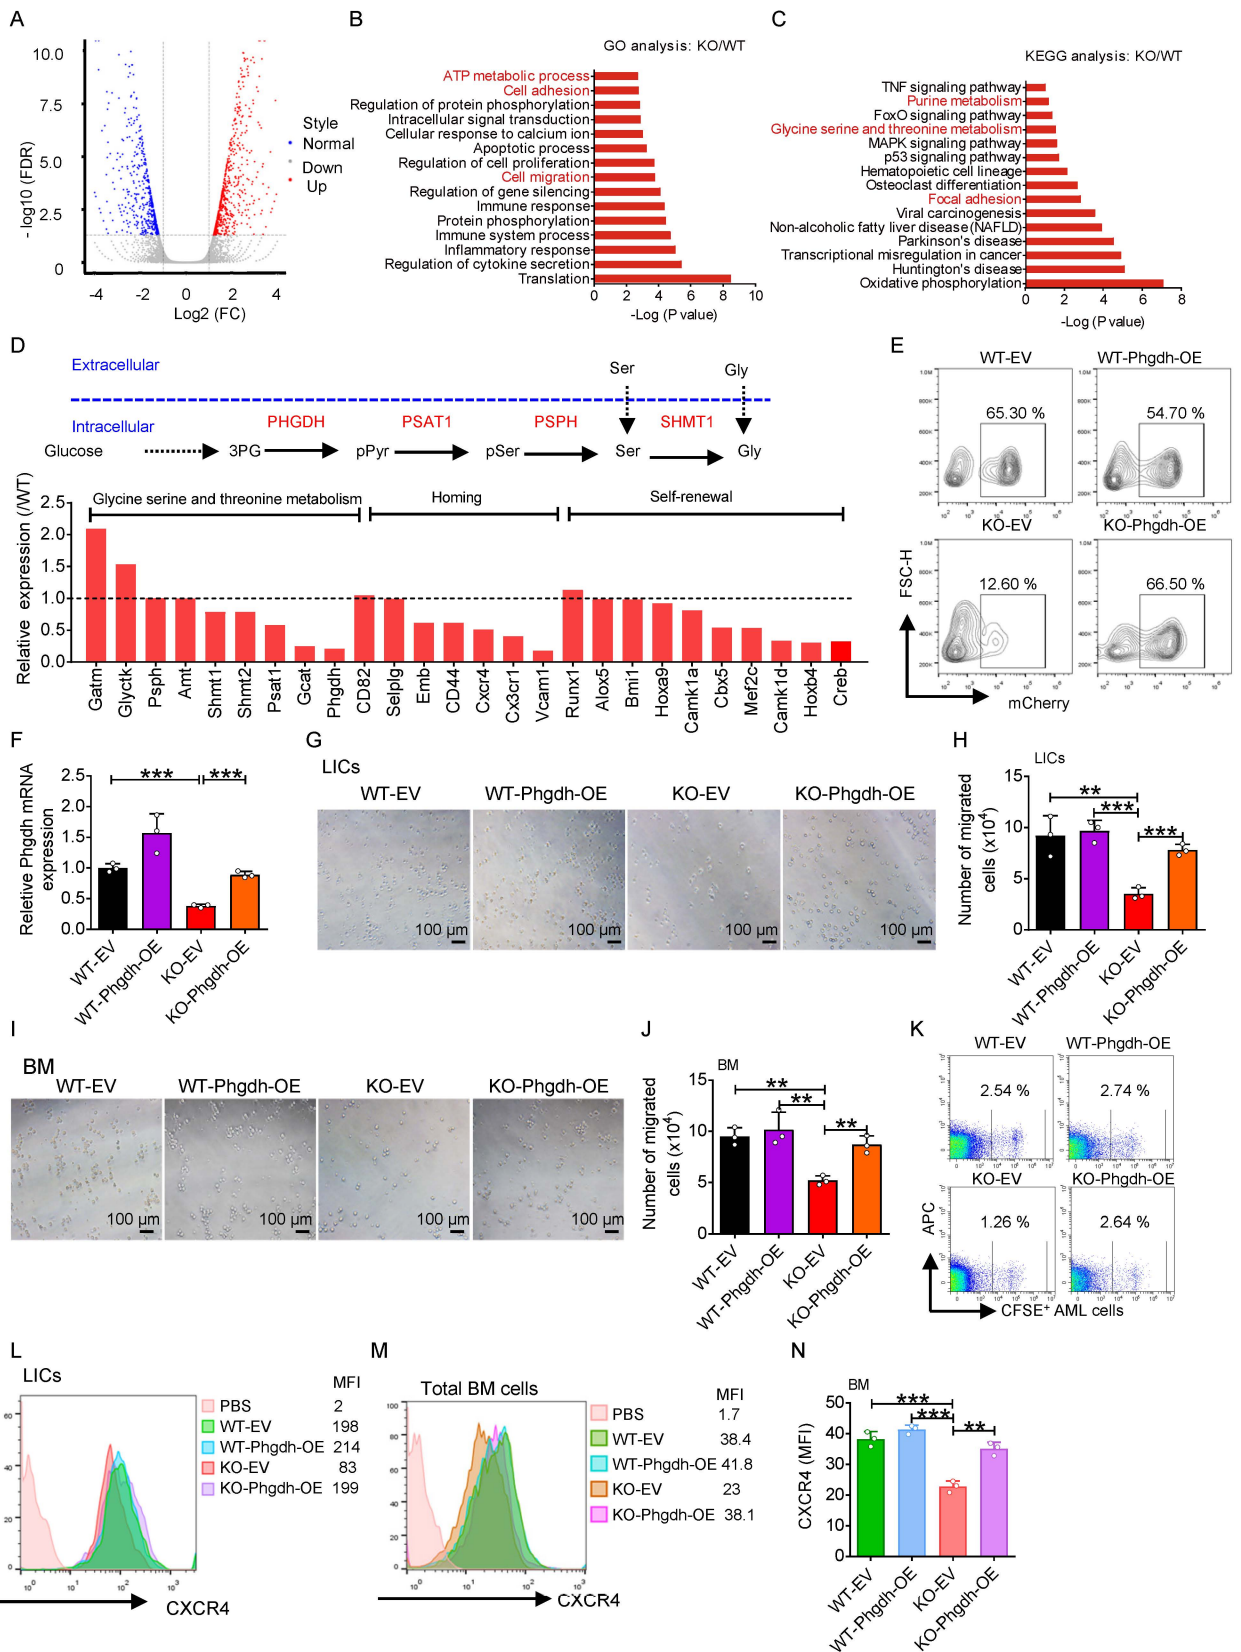

1123 **Figure S5, related to Figure 5. ATP-P2X7 signaling maintains LIC activities by**  
1124 **activating the PHGDH pathway.** A) Volcano plots show differentially expressed  
1125 genes in WT and P2x7-KO Mac-1<sup>+</sup>c-Kit<sup>+</sup> LICs. B-C) GO (biological process) and  
1126 KEGG (pathway) analyses were performed with mRNA-sequencing data of WT or  
1127 P2x7-KO Mac-1<sup>+</sup>c-Kit<sup>+</sup> LICs (n=3 mice/group for three independent experiments and  
1128 representative data from one experiment are shown). D) Candidate genes related to the  
1129 glycine serine and threonine metabolism, self-renewal and homing were analyzed in  
1130 the RNA-sequencing data of WT and P2x7-KO Mac-1<sup>+</sup>c-Kit<sup>+</sup> LICs. E) Representative  
1131 flow cytometric analysis of leukemia cells (YFP<sup>+</sup> mCherry<sup>+</sup>) in the peripheral blood of  
1132 recipient mice transplanted with WT, P2x7-KO, Phgdh-overexpressing WT or P2x7-  
1133 KO leukemia cells. F) The mRNA levels of Phgdh in BM cells of recipient mice  
1134 transplanted with WT, P2x7-KO, Phgdh-overexpressing WT or P2x7-KO AML cells  
1135 were measured by quantitative RT-PCR (n=3; \*\*\*, P<0.001; one-way ANOVA with  
1136 Tukey's multiple comparison test). G-H) A transwell assay was used to test the  
1137 migration abilities of WT, P2x7-KO, Phgdh-overexpressing WT or P2x7-KO Mac-  
1138 1<sup>+</sup>c-Kit<sup>+</sup> LICs. Panel G is the representative images of migrated cells and panel H is  
1139 the quantification data in panel G (n=3; \*\*, P<0.01, \*\*\*, P<0.001; one-way ANOVA  
1140 with Tukey's multiple comparison test). I) The representative images of migrated bulk  
1141 leukemia cells from the groups of WT, P2x7-KO, Phgdh-overexpressing WT or P2x7-  
1142 KO recipients by a transwell assay. J) Quantification of the numbers in panel I (n=3;  
1143 \*\*, P<0.01; one-way ANOVA with Tukey's multiple comparison test). K)  
1144 Representative flow cytometric analysis for CFSE-labeled WT, P2x7-KO, Phgdh-

1145 overexpressing WT or P2x7-KO leukemia cells in the BM of the recipients 16 h after  
1146 transplantation. L) The expression levels of CXCR4 in WT, P2x7-KO, Phgdh-  
1147 overexpressing WT or P2x7-KO Mac-1<sup>+</sup>c-Kit<sup>+</sup> LICs were analyzed by flow cytometry.  
1148 M) The expression levels of CXCR4 in WT, P2x7-KO, Phgdh-overexpressing WT or  
1149 P2x7-KO AML cells were analyzed by flow cytometry. N) Quantification of the mean  
1150 fluorescence intensities (MFI) in panel M (n=3; \*\*, P<0.01, \*\*\*, P<0.001; one-way  
1151 ANOVA with Tukey's multiple comparison test).

Figure S6

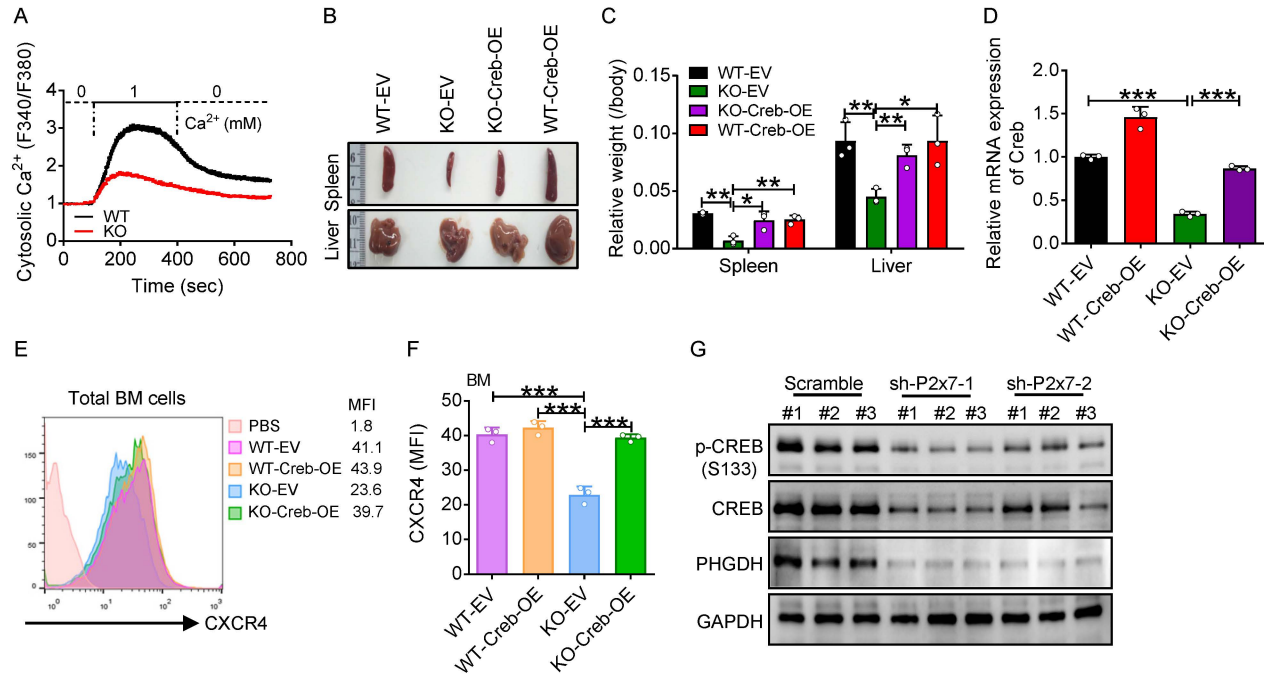

1152 **Figure S6, related to Figure 6. CREB signaling maintains PHGDH levels to**  
1153 **enhance leukemogenesis.** A) Constitutive calcium influx was measured in WT and  
1154 P2x7-KO bulk AML cells using Fura-2 AM (0: Ca<sup>2+</sup>-free solution; 1: solution with 1  
1155 mM Ca<sup>2+</sup>). B) Representative images of the spleens and livers of the recipient mice  
1156 transplanted with WT, P2x7-KO, Creb-overexpressing WT or P2x7-KO AML cells.  
1157 C) Quantification of the weight of spleens and livers in panel B (n=3; \*, P<0.05, \*\*,  
1158 P<0.01; two-way ANOVA with Sidak's multiple comparison test). D) mRNA levels  
1159 of Creb in BM cells of the recipient mice transplanted with WT, P2x7-KO, Creb-  
1160 overexpressing WT or P2x7-KO leukemia cells were measured by quantitative RT-  
1161 PCR (n=3; \*\*\*, P<0.001; one-way ANOVA with Tukey's multiple comparison test).  
1162 E) The protein expression levels of CXCR4 in WT, P2x7-KO, Creb-overexpressing  
1163 WT or P2x7-KO AML cells was analyzed by flow cytometry. F) Quantification of the  
1164 MFI in panel E (n=3; \*\*\*, P<0.001; one-way ANOVA with Tukey's multiple  
1165 comparison test). G) The protein levels of phospho-CREB (S133), CREB and PHGDH  
1166 were determined in Mac-1<sup>+</sup>c-Kit<sup>+</sup> LICs upon the knockdown of P2x7 (sh-P2x7-1 and  
1167 -2) by western blot.



Figure S7

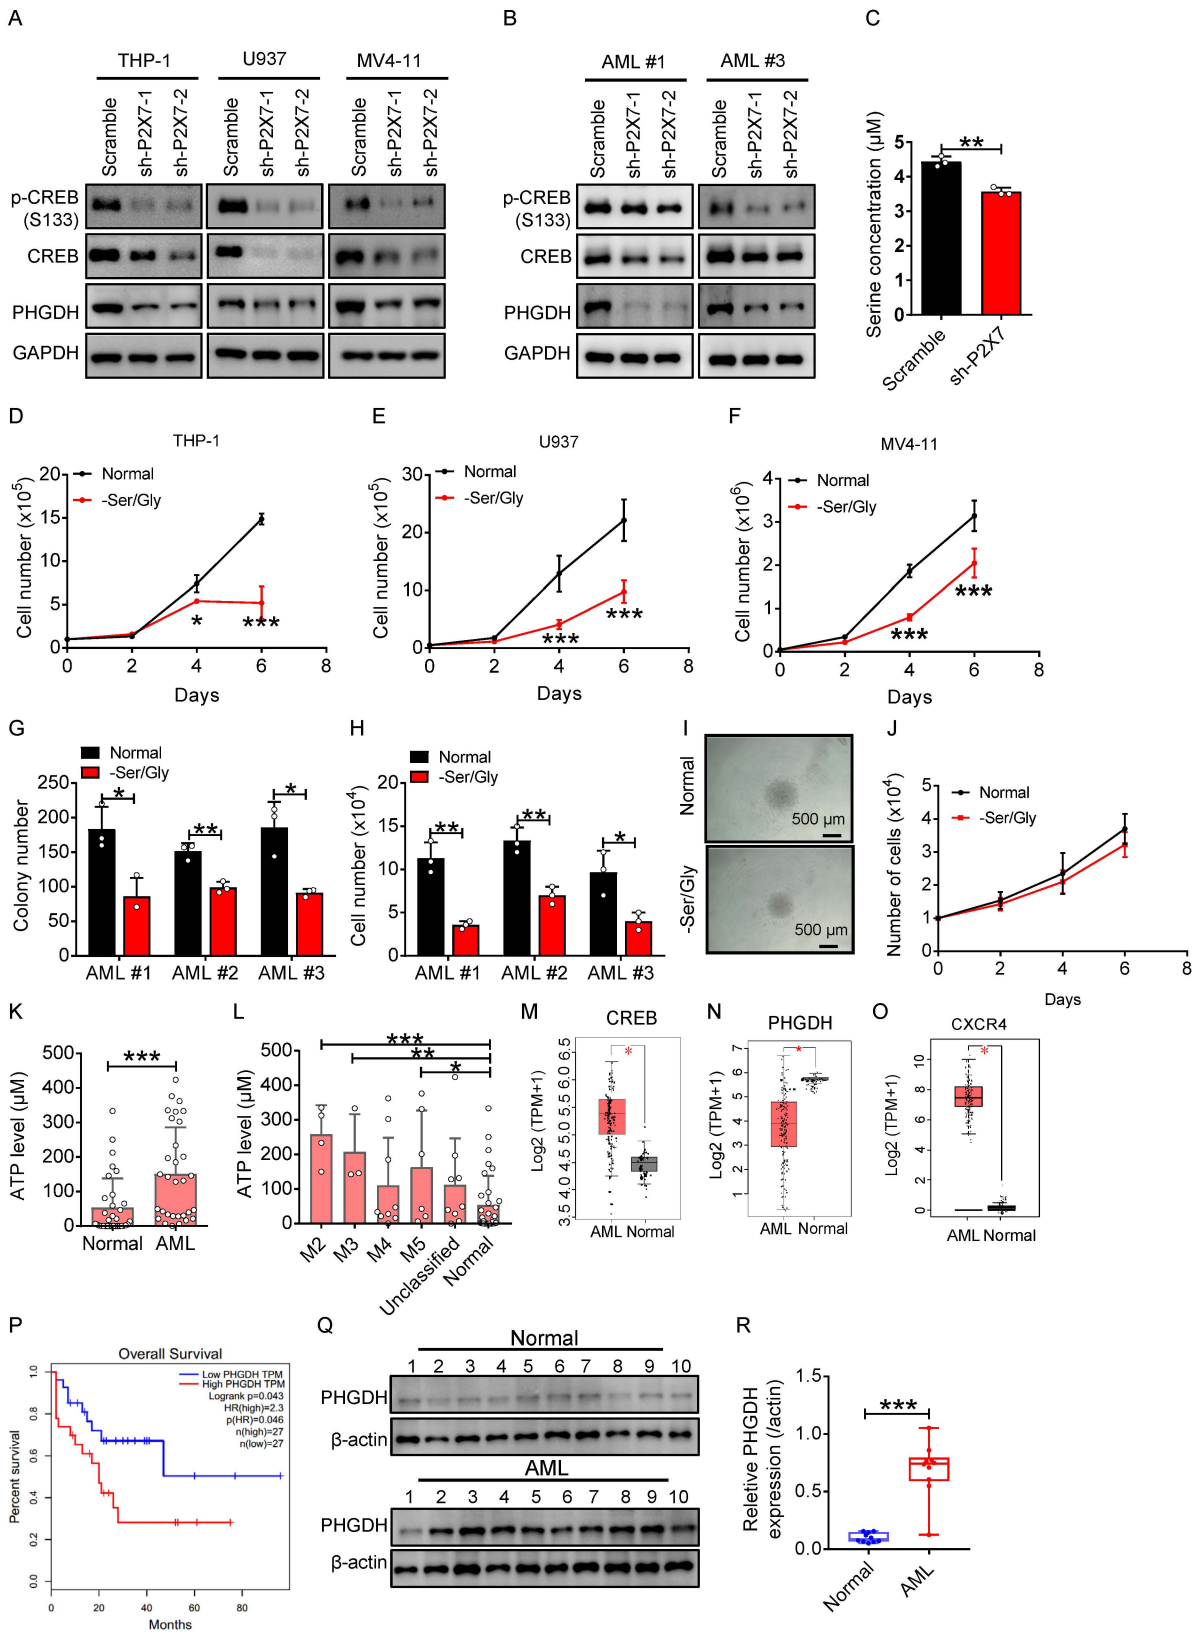

1168 **Figure S7, related to Figure 6. ATP-P2X7 signaling maintains human LIC**  
1169 **activities by activating the CREB/PHGDH pathway.** A) The protein levels of  
1170 phospho-CREB (S133), CREB and PHGDH were determined in the P2X7-knockdown  
1171 THP-1, U937 and MV4-11 cells (sh-P2X7-1 or sh-P2X7-2) or the scrambled controls  
1172 by western blot. B) The protein levels of phospho-CREB (S133), CREB and PHGDH  
1173 were determined in the P2X7-knockdown human CD45<sup>+</sup>GFP<sup>+</sup> AML cells (sh-P2X7-1  
1174 or sh-P2X7-2, AML#1 and AML#3) from the recipient mice by western blot. C) Serine  
1175 levels were measured in human AML cells upon the knockdown of P2X7 (sh-P2X7)  
1176 and the control group by LC-MS/MS (n=3; \*\*, P<0.01; Student's t test). D-F) The  
1177 numbers of THP-1, U937 and MV4-11 cells were determined at the indicated days  
1178 after cultured in the presence or absence of the serine and glycine (Normal or -Ser/Gly)  
1179 (n=3; \*, P<0.05, \*\*\*, P<0.001; two-way ANOVA with Sidak's multiple comparison  
1180 test). G-H) The colony formation abilities of human AML cells upon the depletion of  
1181 the serine and glycine (Normal or -Ser/Gly) were compared to that of the control group.  
1182 The colony numbers (G) and derived total cell counts (H) were calculated (n=3; \*, P<  
1183 0.05, \*\*, P< 0.01; two-way ANOVA with Sidak's multiple comparison test). I-J) The  
1184 CD34<sup>+</sup> cord blood cells were cultured in the presence or absence of the serine and  
1185 glycine (Normal or -Ser/Gly) and cell numbers were determined at the indicated days  
1186 after culture (n=3). K-L) Biochemical analysis of ATP levels in BM fluid of healthy  
1187 controls (Normal) and human AML samples (AML, K), as well as of different AML  
1188 subtypes. (Normal, n=33; AML, n=31; M2, n=4; M3, n=3; M4, n=9; M5, n=6;  
1189 Unclassified, n=9; \*, P<0.05; \*\*, P<0.01; \*\*\*P<0.001, Student's t test). M-O) The

1190 mRNA expression levels of CREB (M), PHGDH (N) and CXCR4 (O) were analyzed  
1191 in AML cells and normal BM cells from the TCGA database (AML, n=173; Normal,  
1192 n=70; \*, P<0.05; Student's t test). P) The relationship between the PHGDH expression  
1193 level and the overall survival in AML patients from the TCGA database. Q) The protein  
1194 levels of PHGDH were determined in the BM cells of healthy control (normal) and  
1195 human AML samples by western blot. R) Quantification of the protein level of  
1196 PHGDH in panel Q (n=10, \*\*\*, P<0.001; Student's t test).

Figure S8

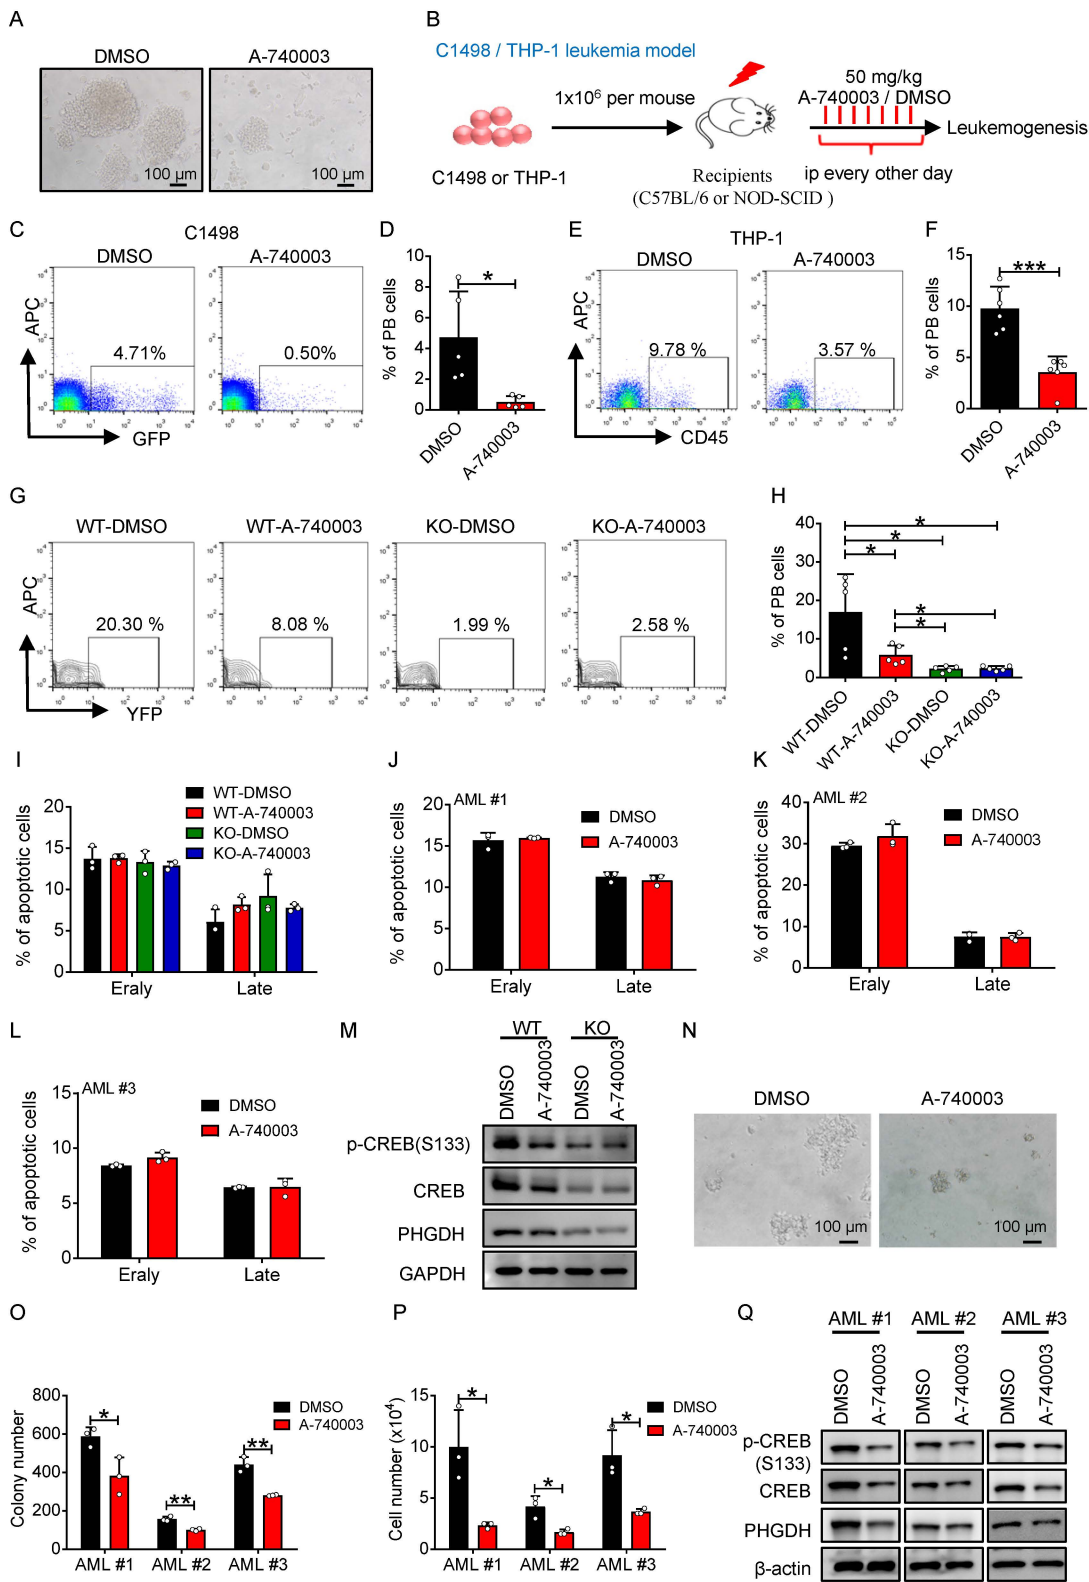

1197 **Figure S8, related to Figure 7. Targeting leukemia development by suppressing**  
1198 **ATP-P2X7 signaling.** A) Representative images of the colonies of THP-1 cells treated  
1199 with A-740003 (10  $\mu$ M) and DMSO are shown. B) Schematic diagram of the C1498  
1200 cell or THP-1 cell leukemia model for the in vivo treatment with A-74003. The mice  
1201 were transplanted with murine C1498 cells or THP-1 cells pretreated with A-740003  
1202 (10  $\mu$ M) or DMSO in vitro, followed by the treatment with A-740003 or DMSO (50  
1203 mg/kg every other day for 2 weeks) 1 day after transplantation. C-D) Representative  
1204 flow cytometric analysis of leukemia cells in the peripheral blood of recipients  
1205 transplanted with C1498 cells 3 weeks after transplantation is shown (C).  
1206 Quantification data are shown in panel D (n=5; \*, P<0.05; Student's t test). E-F)  
1207 Representative flow cytometric analysis of leukemia cells in the peripheral blood of  
1208 recipients transplanted with THP-1 cells (E) and quantification of the frequency of  
1209 leukemia cells in panel E are shown (F) (n=5; \*\*\*, P<0.001; Student's t test). G-H) WT  
1210 and P2x7-KO AML cells were transplanted into the recipient mice, followed by the  
1211 intraperitoneal injection with A-740003 7 days after transplantation (50 mg/kg every  
1212 other day for 2 weeks). Shown are the representative flow cytometric analysis of AML  
1213 cells in the peripheral blood (G) and quantification data (H) 3 weeks after  
1214 transplantation (n=5; \*, P<0.05; one-way ANOVA with Tukey's multiple comparison  
1215 test). I-L) Murine (I) and human primary AML cells (J-L) were treated with A-740003  
1216 or DMSO for 48 h, followed by the determination of the apoptotic status by flow  
1217 cytometric analysis (n=3). M) WT and P2x7-KO AML cells were treated with A-  
1218 740003 or DMSO for 48 h and the protein levels of phospho-CREB (S133), CREB and

1219 PHGDH were determined by western blot. N-P) Representative images of colonies  
1220 derived from patient's AML cells treated with A-740003 and DMSO are shown (N).  
1221 The colony numbers (O) and derived total cell counts (P) in panel K were calculated.  
1222 A total of three human primary samples were evaluated (AML #1-#3) (n=3; \*, P<0.05,  
1223 \*\*, P<0.01; two-way ANOVA with Sidak's multiple comparison test). Q) Human  
1224 CD45<sup>+</sup> AML cells were treated with A-740003 or DMSO for 48 h and the protein levels  
1225 of phospho-CREB (S133), CREB and PHGDH were determined by western blot.

Figure S9

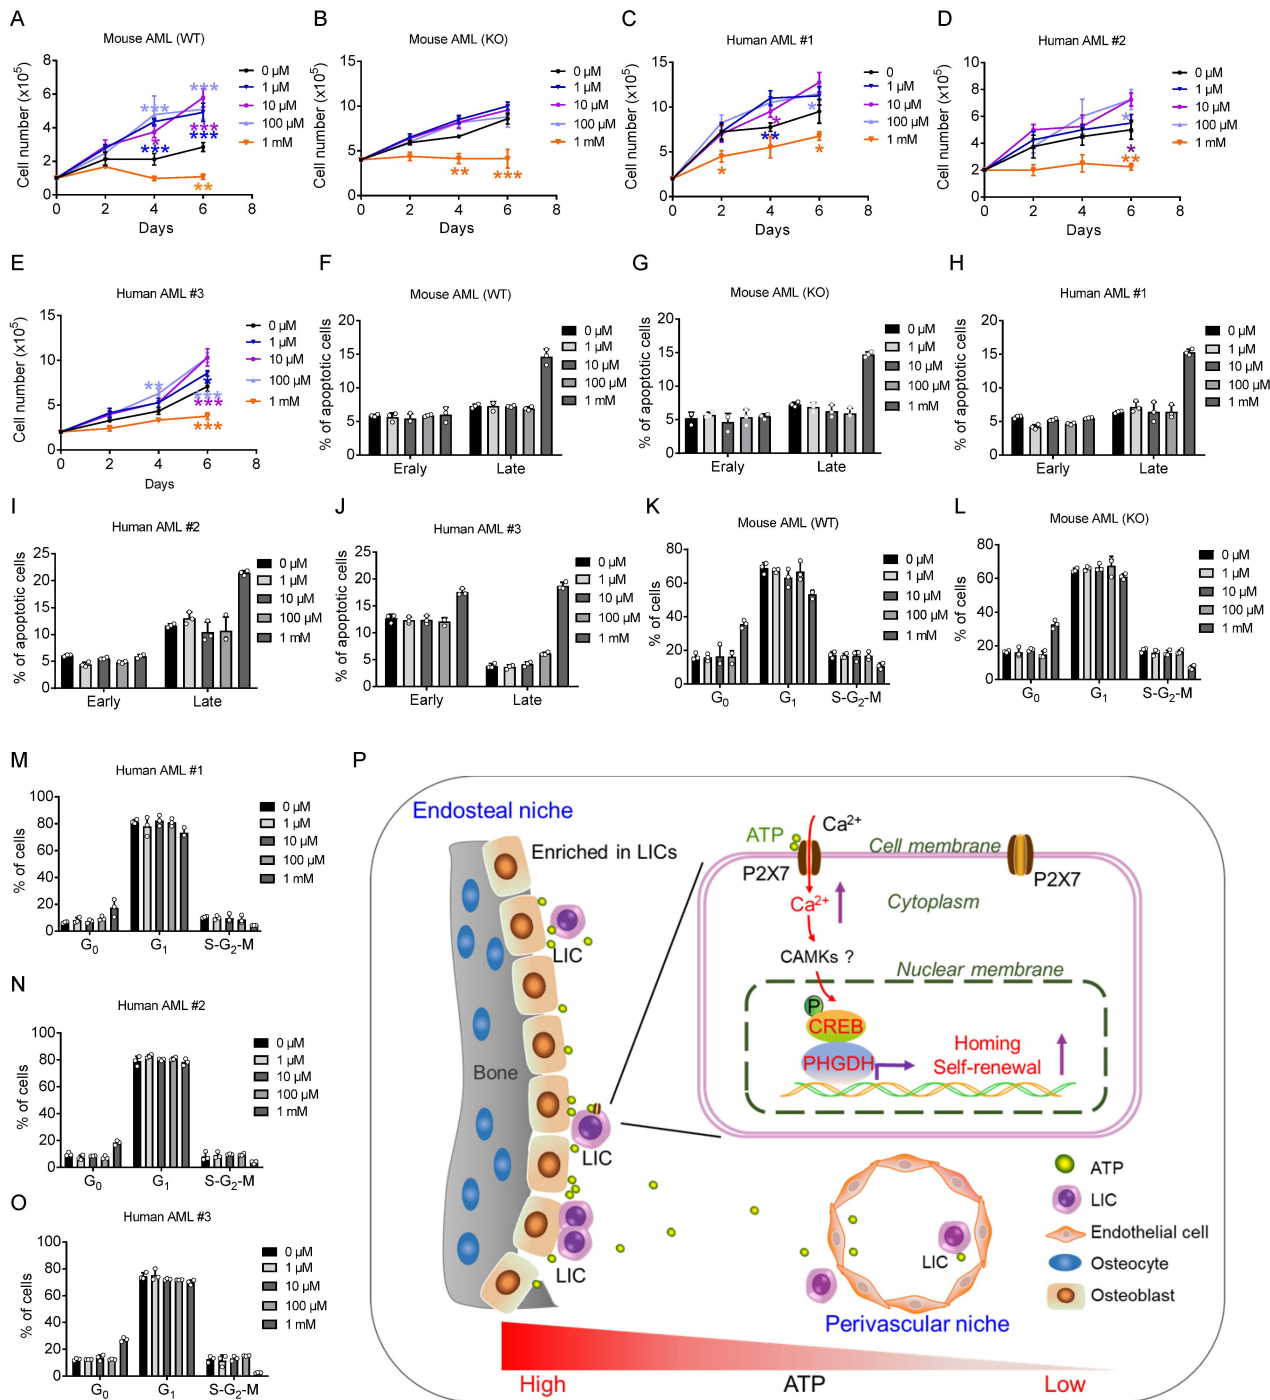

1226 **Figure S9, related to Figure 7. Effects of ATP treatment in vitro in both murine**  
1227 **and human primary AML cells.** A-E) WT and P2x7-null murine primary AML (A-B)  
1228 and human primary AML cells (C-E) were treated with the indicated doses of ATP and  
1229 the numbers were calculated at indicated time points (n=4, \*, P<0.05; \*\*, P<0.01;  
1230 \*\*\*P<0.001, one-way ANOVA with Tukey's multiple comparison test). F-J) WT and  
1231 P2x7-null murine (F-G) and human AML cells (H-J) were treated with the indicated  
1232 doses of ATP for 48 h and their apoptosis was determined (n=3). K-O) WT and P2x7-  
1233 null murine (K-L) and human AML cells (M-O) were treated with the indicated doses  
1234 of ATP for 48 h and their cell cycle was analyzed (n=3). P) Working model for the  
1235 functions of ATP-P2X7 signaling in the determination of the fates of AML-LICs.



1236 **Supplemental Methods**

1237 **Animals**

1238 The CD45.1 mice were provided by Dr. Jiang Zhu at Ruijin Hospital, Shanghai, China.  
1239 The P2X7-knockout (KO) mice with a C57BL/6 background were generated at the  
1240 Animal Core Facility at the School of Basic Medicine, Shanghai Jiao Tong University  
1241 School of Medicine. Six-eight-week old C57BL/6 CD45.2 and NOD-SCID mice were  
1242 ordered from the Shanghai SLAC Laboratory Animal Company and maintained at the  
1243 Animal Core Facility at Shanghai Jiao Tong University School of Medicine. All animal  
1244 experiments were approved by our hospital and conducted under the guidance of animal  
1245 care at Shanghai Jiao Tong University School of Medicine.

1246

1247 **P2x7 knockout generation**

1248 The sgRNA was designed to target the sequence of exon 2 of P2x7 (MGI:1339957)  
1249 gene. The pCD-CAS plasmid (Biotechnologies) was used as the template for PCR with  
1250 the primer-sgRNA and T7R1. The PCR products were purified and used for in vitro  
1251 RNA synthesis with a MEGASHORT T7 high yield Transcription Kit (Ambion). The  
1252 sgRNA was purified with a MEGAclean-96 Purification of Transcription Reactions Kit  
1253 (Ambion). The pT7-cas9 plasmid (Biotechnologies) was linearized by Xba I and  
1254 transcribed into mRNA in vitro using a mMESAGE mMACHINE™ T7 ULTRA  
1255 Transcription Kit (Ambion). Approximately 5 pL of the mixture of the Cas9 mRNA (20  
1256 ng/μL) and sgRNA (10 ng/μL) was injected into the cytoplasm of C57BL/6 zygote with  
1257 a 3 μm diameter pipette using a Piezo instrument (Pmm 4G, Prime Tech). After  
1258 microinjection, zygotes were cultured in KSOM medium in a humidified atmosphere  
1259 containing 5% CO<sub>2</sub> and 95% air at 37°C for 24 h. The embryos at the 2-cell stage were  
1260 surgically transferred to both the oviducts of recipient ICR mice. Genomic DNA was

1261 extracted from the toe tissues of one-week old mice by using a TIANGEN Genomic  
1262 DNA kit (TIANGEN). The fragments were amplified from genomic DNA by PCR  
1263 using the primers. Three F0 mice were born and a messy peak appeared near the  
1264 sgRNA2 in one of the mouse sequencing results. F1 mice were further obtained and  
1265 one mouse line carrying 7bp deletion was subjected to the current studies.

1266

### 1267 **Cloning of iATPSnFR**

1268 The iATPSnFR<sup>1.0</sup> (45) sensor gene was synthesized by GenScript Biotech Co., Ltd. For  
1269 the ratiometric measurement, the red fluorescent protein mCherry was fused to the N-  
1270 terminus of iATPSnFR using overlap PCR, with an NheI restriction site between  
1271 mCherry and iATPSnFR coding sequence. For imaging cell surface ATP, the sequence  
1272 mCherry-iATPSnFR with N-terminal secretion signal and the C-terminal  
1273 transmembrane anchoring domain of platelet-derived growth factor receptor (PDGFR)  
1274 was cloned into the pLVX-IRES-Puro plasmid with the same restriction site EcoRI and  
1275 NotI. The control sensor mCherry-cpSFGFP was performed by the same construction  
1276 method as the mCherry-iATPSnFR.

1277

### 1278 **Imaging of iATPSnFR-expressing AML cells in vitro and in vivo**

1279 To evaluate whether the cell-surface anchored iATPSnFR sensor can sensitively  
1280 indicate the dynamic changes of the extracellular ATP levels, a human AML cell line of  
1281 U937 or MLL-AF9<sup>+</sup> murine primary AML cells were overexpressed with iATPSnFR  
1282 sensor and the control sensor (mCherry-cpSFGFP, NC), plated onto a 35 mm glass-  
1283 bottom dish (Cellvis) precoated with 100 µg/mL Poly-D-lysine hydrobromide and  
1284 maintained in the serum-free RPMI-1640 medium before imaging. iATPSnFR signaling  
1285 was determined using the NiKon A1 confocal microscope at the excitation wavelengths

1286 of 488 nm (to measure the ATP level) and 561 nm (to normalize the iATP sensor protein  
1287 level in individual cells) and acquired at the emission wavelengths of 525 nm and 585  
1288 nm, respectively. To monitor the dynamic ratio changes of iATPSnFR fluorescence  
1289 upon the ATP stimulation, 2 mM ATP or PBS was added to the medium upon the first  
1290 image was taken. iATPSnFR signaling was measured every 1.5 min for a total of 40  
1291 min. The iATPSnFR fluorescence ratios and pseudocolor images were evaluated by  
1292 ImageJ software. The dynamic changes of iATPSnFR fluorescence ratio were  
1293 normalized to that in the first image.

1294 To label the vascular endothelial cells *in vivo*, 10 µg eFluor660-conjugated anti-VE-  
1295 cadherin antibodies (BV13, eBiosciences) in 200 µL of PBS were injected into recipient  
1296 mice by intravenous injection. For the *ex vivo* imaging of the BM niches in the cranium,  
1297 mice were sacrificed 10 min after the injection of VE-cadherin antibodies, followed by  
1298 the isolation of the cranium. The bone surface of the cranium was gently scraped with  
1299 a surgical blade without damaging the BM to facilitate the subsequent imaging. The  
1300 skived cranium was immersed in a 35 mm glass bottom dish with the RPMI-1640  
1301 medium containing 2% FBS and subjected to imaging with the confocal microscope.  
1302 iATPSnFR or its control sensor (NC) signaling was measured using NiKon A1 confocal  
1303 microscope at excitation wavelength of 488 nm and 561 nm and emission wavelengths  
1304 of 525 nm and 585 nm, respectively. The fluorescence of VE-cadherin-eFluor660  
1305 labeled blood vessels in the BM was also measured. Differential interference contrast  
1306 (DIC) was used to show the structure of the BM and bones. The iATPSnFR fluorescence  
1307 ratio or the control fluorescence ratio and pseudocolor images were analyzed by ImageJ  
1308 software.

1309

1310 **Establishment of the AML model and BM competitive transplantation**

1311 To establish the murine AML model, an MSCV-MLL-AF9-IRES-YFP-encoding  
1312 plasmid (50) and a pCL-ECO packaging plasmid (2:1) were co-transfected into 293T  
1313 cells to produce retroviruses. Retroviruses were used for the infection of isolated WT  
1314 or P2x7-KO Lin<sup>-</sup> fetal liver cells through two rounds of spinning infection in the  
1315 presence of 4 µg/mL polybrene. Infected cells (1-3×10<sup>5</sup>) were transplanted into the  
1316 lethally irradiated C57BL/6 wild-type (WT) recipient mice by retroorbital injection,  
1317 followed by the analysis for the frequency of leukemia cells in the peripheral blood and  
1318 the overall survival of the leukemic mice. Serial transplantations were performed with  
1319 the same number of the purified YFP<sup>+</sup> or GFP<sup>+</sup> BM AML cells. To exclude the homing  
1320 effect, 1x10<sup>4</sup> WT and P2x7-null YFP<sup>+</sup> BM leukemia cells were transplanted into the  
1321 lethally irradiated C57BL/6 recipient mice by intratibial injection, followed by the  
1322 analysis for the frequency of leukemia cells in the peripheral blood and the overall  
1323 survival of the leukemic mice. The limiting dilution assay was performed with the  
1324 indicated YFP<sup>+</sup> BM leukemia cells (30, 100 and 500), followed by the calculation of  
1325 the frequency of the functional LICs according to the overall survival of recipients using  
1326 the L-Calc software (Stemcell Technologies). In some cases, the shRNA plasmids  
1327 (pLKO.1-IRES-GFP) specifically targeting murine or human P2x7 or P2X7 were co-  
1328 transfected with pSPAX2 and pMD2G packaging plasmids (4:3:1) into 293T cells.  
1329 Lentiviruses were used for the infection of MLL-AF9-YFP<sup>+</sup> BM AML cells, THP-1  
1330 cells (ATCC) or patients' primary AML cells (Table S3). FACS-purified GFP<sup>+</sup> BM  
1331 leukemia cells (5,000-10,000), GFP<sup>+</sup> THP-1 cells (5×10<sup>6</sup>) or 2×10<sup>6</sup> human primary  
1332 AML cells, were injected into the lethally irradiated C57BL/6 or the sublethally  
1333 irradiated NOD-SCID mice, followed by the analysis of leukemia development.

1334 For the rescue experiments, the retroviral plasmid XZ201-Creb-HA-mCherry or  
1335 pMIGR1-Phgdh-T2A-mCherry were mixed with pCL-ECO packaging plasmid at a

1336 ratio of 2:1 and transfected into 293T cells. Virus-containing supernatant was collected  
1337 for the infection with WT and P2x7-KO BM bulk leukemia cells, followed by the  
1338 transplantation into the recipient mice. The expression levels of Creb and Phgdh were  
1339 further measured in WT, P2x7-KO, Creb- or Phgdh-overexpressing WT or P2x7-KO  
1340 leukemia cells by quantitative RT-PCR.

1341 For the competitive reconstitution analysis, a total number of  $3 \times 10^5$  WT or P2x7-KO  
1342 CD45.2 donor BM cells were mixed with  $3 \times 10^5$  CD45.1 competitor BM cells and  
1343 transplanted into the lethally irradiated CD45.1 recipient mice by retroorbital injection.  
1344 The repopulated donor cells in the peripheral blood were analyzed at 3, 8, and 16 weeks  
1345 after transplantation. Multilineages of the hematologic cells in the peripheral blood  
1346 were also evaluated 16 weeks after transplantation.

1347

#### 1348 **Flow cytometry**

1349 Flow cytometric analyses were performed as previously described (48). Briefly, the WT  
1350 or P2x7-KO/-knockdown immunophenotypic Mac-1<sup>+</sup>c-Kit<sup>+</sup> LICs, myeloid or  
1351 lymphoid lineages were stained with the monoclonal antibodies (eBioscience) of anti-  
1352 Mac-1-APC (or PE), anti-Gr-1-PE, anti-CD3-APC, anti-B220-PE and anti-c-Kit-PE (or  
1353 APC). Murine Lin<sup>-</sup>CD127<sup>-</sup>Sca-1<sup>-</sup>c-Kit<sup>+</sup>CD16/32<sup>+</sup>CD34<sup>+</sup> L-GMP cells were stained  
1354 with the biotinylated antibodies of anti-CD127, anti-Gr-1, anti-B220, anti-CD3, anti-  
1355 CD8 and anti-Ter119, followed by staining with the antibodies of streptavidin-  
1356 PE/Cy5.5, Sca-1-PE/Cy7, c-Kit-APC, CD16/32-eflour450 and CD34-PE (eBioscience).  
1357 Anti-CXCR4-PE antibody (eBioscience) was used for the determination of the CXCR4  
1358 expression levels of WT and P2x7-KO Mac-1<sup>+</sup>c-Kit<sup>+</sup> LICs or bulk leukemia cells. The  
1359 repopulation and its multilineages were evaluated in WT and P2x7-KO donor HSCs  
1360 with the antibodies of anti-CD45.1-PE, anti-CD45.2-APC, anti-Mac-1-APC, anti-Gr-

1361 1-PE, anti-CD3-APC and anti-B220-PE. In some cases, human AML cell lines and  
1362 primary AML cells were stained with the antibodies of anti-CD45-PE (or FITC), anti-  
1363 CD33-PE, anti-CD15-FITC, anti-CD34-PE, anti-CD19-APC and anti-CD20-PE.  
1364 Detailed antibody information is listed in Supplemental Table 5

1365

### 1366 **Quantitative RT-PCR**

1367 The candidate genes were further validated in Mac-1<sup>+</sup>c-Kit<sup>+</sup> LICs by quantitative RT-  
1368 PCR. Murine P2xs and human P2Xs were also measured in murine Mac-1<sup>+</sup>c-Kit<sup>+</sup> LICs,  
1369 Lin<sup>-</sup>CD127<sup>-</sup>Sca-1<sup>-</sup>c-Kit<sup>+</sup>CD16/32<sup>+</sup>CD34<sup>+</sup> L-GMP cells, bulk leukemia cells, Lin<sup>-</sup>Sca-  
1370 1<sup>+</sup>c-Kit<sup>+</sup>CD34<sup>+</sup>Flk2<sup>-</sup> HSCs, human AML cell lines, human Lin<sup>-</sup>CD34<sup>+</sup>CD38<sup>-</sup>  
1371 CD90<sup>+</sup>CD45RA<sup>-</sup> HSCs or human Lin<sup>-</sup>CD34<sup>+</sup>CD38<sup>-</sup>CD90<sup>-</sup>CD45RA<sup>+</sup> LICs, respectively.  
1372 Briefly, first-strand cDNA was reversely transcribed using AMV reverse transcriptase  
1373 (TakaRa). PCR reactions were performed according to the manufacturer's protocol with  
1374 the Applied Biosystems 7900HT. The mRNA levels were normalized to the level of  $\beta$ -  
1375 actin RNA transcripts. The primer sequences used are shown in Table S2.

1376

### 1377 **In vitro colony forming unit assay and cell proliferation analysis**

1378 Three thousand murine BM AML cells were seeded in the methylcellulose medium  
1379 (M3534, Stem Cell Technologies) according to the manufacturer's information. The  
1380 numbers of colonies and derived cell counts were determined 5-8 days after plating.  
1381 Then the same numbers of AML cells from primary plating were subjected to secondary  
1382 plating. In another case, 10  $\mu$ M of P2X7 antagonist (A-740003, TOCRIS) or DMSO  
1383 were added to the methylcellulose medium and colony formation abilities were  
1384 determined. For colony forming assay of human primary AML cells, P2X7-knockdown  
1385 (sh-P2X7-1 and -2) and the scrambled AML cells were seeded to the methylcellulose

1386 medium (H4436, Stemcell Technologies) according to the manufacturer's information,  
1387 followed by the calculation of the colony numbers and derived total cell counts 7-10  
1388 days after plating. In some cases, the methylcellulose medium in the presence (Normal)  
1389 or absence of serine and glycine (-Ser/Gly) was used for the evaluation of the colony  
1390 formation capacities of murine and human primary AML cells at the indicated days  
1391 after plating; or the in vitro pretreated murine AML cells were further subjected to the  
1392 transplantation into the recipient mice and their overall survival was evaluated.

1393 Human AML cell lines, such as THP-1 (ATCC), U937 (ATCC) and MV4-11 (ATCC),  
1394 were cultured in the RPMI-1640 medium containing 10% fetal bovine serum (FBS) and  
1395 subjected to the analysis of the changes in proliferation upon P2X7 knockdown (sh-  
1396 P2X7-1, -2 or scrambled) at the indicated time points. In some experiments, the RPMI-  
1397 1640 medium in the presence or absence serine and glycine was used for the evaluation  
1398 of the proliferation abilities of human AML cell lines including THP-1, U937 and MV4-  
1399 11 cells. For analyze the proliferation abilities of human cord blood CD34<sup>+</sup> cells, the  
1400 cells were cultured in the RPMI-1640 medium in the presence or absence serine and  
1401 glycine medium supplemented with cytokines including 10 ng/mL of SCF, 10 ng/mL  
1402 TPO, 10 ng/mL FLT3-L, 10 ng/mL of IL-3 and 10 ng/mL of IL-6. Cell numbers were  
1403 calculated at indicated time points.

1404 For ATP treatment in vitro, murine BM AML cells or human primary AML cells  
1405 (Table S3) were cultured in basic medium (Stemcell Technologies) supplemented with  
1406 10 ng/mL of SCF, 10 ng/mL of IL-3 and 10 ng/mL of IL-6 (Peprotech). Different doses  
1407 of ATP (0  $\mu$ M, 10  $\mu$ M, 100  $\mu$ M and 1 mM) were added to the medium for the analysis  
1408 of the cell proliferation at the indicated time points.

1409

1410 **Giemsa-Wright staining and H&E staining**

1411 Wright-Giemsa staining was performed with murine AML cells in the blood smear of  
1412 the peripheral blood and the BM from the recipient mice, and the frequency of the blast  
1413 cells and differentiated leukemia cells were calculated according to the typical  
1414 morphologies. In some cases, the livers and spleens of the leukemic mice were fixed  
1415 with 4% paraformaldehyde and embedded in paraffin. The liver and spleen paraffin  
1416 sections were stained with H&E and evaluated for the infiltration of AML cells.

1417

#### 1418 **Homing assay**

1419 Homing assays were performed as previously described (14). Briefly, a total number of  
1420  $2-5 \times 10^6$  WT, P2x7-KO, Phgdh-overexpressing WT or P2x7-KO BM AML cells were  
1421 labeled with 5(6)-carboxy fluorescein diacetate succinimidyl ester (CFSE) and  
1422 transplanted into the lethally irradiated recipient mice. The frequency of the CFSE<sup>+</sup> cells  
1423 were measured in the BM 16 h after transplantation by flow cytometric analysis.

1424

#### 1425 **Transwell assay**

1426 A total number of  $3 \times 10^5$  WT, P2x7-KO, Phgdh-overexpressing WT or P2x7-KO Mac-  
1427 1<sup>+</sup>c-Kit<sup>+</sup> LICs or YFP<sup>+</sup> bulk AML cells were purified, washed once with serum-free  
1428 PBS, resuspended in the culture medium (RPMI-1640+5% BSA) and seeded in the  
1429 upper chamber of a transwell. Six hundred microliter of the RPMI-1640 medium  
1430 containing 5% BSA and 160 ng/mL SDF-1 $\alpha$  were added to the lower chamber. The  
1431 numbers of Mac-1<sup>+</sup>c-Kit<sup>+</sup> LICs or YFP<sup>+</sup> bulk AML cells that migrated to the lower  
1432 chamber were calculated 4-6 h after culture.

1433

#### 1434 **Immunofluorescence staining**

1435 Immunofluorescence staining was performed as previously described (14). In brief, the



1436 fresh long bones were isolated from the leukemic mice transplanted with WT or P2x7-  
1437 KO AML cells and fixed in 4% paraformaldehyde solution at 4°C for overnight. The  
1438 fixed bones were then decalcified in 15% EDTA at 4 °C for 3 days. The decalcified  
1439 long bones were then embedded in OCT (Fisher) and sectioned longitudinally using a  
1440 cryostat (Leica). Intact half-bone sections were washed with PBS to remove OCT,  
1441 followed by the incubation with the indicated primary antibodies at 4°C overnight. The  
1442 sections were further washed with PBS, stained with a secondary antibody and  
1443 subjected to the evaluation of the changes of the localizations of LICs in the BM.  
1444 Images were obtained with a NiKonA1 confocal microscope. The following antibodies  
1445 are used in the current study: anti-c-Kit (R&D Systems, AF1356), anti-Laminin  
1446 (Abcam, ab11575), anti-goat secondary antibody conjugated with Alexa Fluor647 and  
1447 anti-rabbit secondary antibody conjugated with Alexa Fluor555 (Thermo Fisher  
1448 Scientific, A-31572 and A-21447).

1449

#### 1450 **Calcium imaging**

1451 WT and P2x7-KO Mac-1<sup>+</sup>c-Kit<sup>+</sup> LICs or YFP<sup>+</sup> bulk AML cells were seeded on the glass  
1452 coverslips pretreated with poly-D-lysine (100 µg/mL, Sigma). Cells were then  
1453 incubated with Fura-2-AM (2 µM, Thermo) and Pluronic F127 (0.02% (w/v), Sigma)  
1454 for 30 min at 37 °C. Fluorescent intensities at excitation wavelength of 340 nm and 380  
1455 nm were measured using NIS-Elements Soft every 2 sec. For the detection of the  
1456 constitutive Ca<sup>2+</sup> influx, leukemia cells were incubated in the Ca<sup>2+</sup>-free buffer for 2 min,  
1457 followed by the switch to the buffer with 1 mM Ca<sup>2+</sup> for 2 min and the Ca<sup>2+</sup>-free  
1458 medium later on. The ratios of fluorescence at excitation wavelength of 340 nm (F340)  
1459 and 380 nm (F380) were recorded every 2 sec and calculated.

1460

1461 **Whole-cell patch-clamp electrophysiological recording**

1462 The whole-cell patch-clamp recordings were performed using Axon 200B (Axon  
1463 Instruments, Foster City, CA) with a voltage clamp. The recording electrodes were  
1464 filled with a pipette solution. Patch electrodes (3-5 M $\Omega$ ) were filled with intracellular  
1465 solution containing 30 mM NaCl, 120 mM KCl, 1 mM MgCl<sub>2</sub>, 0.5 mM CaCl<sub>2</sub>, 5 mM  
1466 EGTA and 10 mM HEPES (pH 7.2). Indicated cells were incubated in the standard  
1467 extracellular solution with 150 mM NaCl, 10 mM glucose, 5 mM KCl, 1 mM MgCl<sub>2</sub>,  
1468 2 mM CaCl<sub>2</sub> and 10 mM HEPES (pH 7.4). CaCl<sub>2</sub> and MgCl<sub>2</sub> were substituted with 5  
1469 mM EGTA in the Ca<sup>2+</sup>-free solution. Then the membrane current signals were amplified  
1470 by using Axon 200B. Data were sampled at 10 kHz and filtered at 2 kHz. CHO cell  
1471 electrophysiology was recorded 24-48 h after transfection. Murine Mac-1<sup>+</sup>c-Kit<sup>+</sup> LICs  
1472 or human Lin<sup>-</sup>CD34<sup>+</sup>CD38<sup>-</sup>CD90<sup>+</sup>CD45RA<sup>+</sup> primary LICs were seeded on the glass  
1473 coverslips pretreated with poly-D-lysine (100  $\mu$ g/mL, Sigma) before imaging. The  
1474 antagonist of P2X7, A-740003, was used for the inhibition after ATP stimulation. Data  
1475 were analyzed using a Digi data 1440 interface and a computer with the Clampex and  
1476 Clampfit 10.0 software (Molecular Devices). All currents were sampled and analyzed.  
1477

1478 **Luciferase reporter assay**

1479 A luciferase reporter vector pGL4.27 containing a Phgdh promoter was constructed to  
1480 identify the transcriptional activation of Phgdh by Creb. The indicated doses of XZ201-  
1481 HA-Creb-mCherry (or negative control vector) plasmid and the pGL4.27-Phgdh  
1482 promoter vector were co-transfected into 293T cells. Twenty-four hours after  
1483 transfection, luciferase activities were measured using a luciferase reporting system  
1484 (GloMax<sup>®</sup> Multi Instrument). The luciferase measurement is the ratio of firefly  
1485 luciferase units to Renilla luciferase units.

1486

### 1487 **Chromatin immunoprecipitation (ChIP) assays**

1488 ChIP assays were performed using the ChIP Assay Kit (Beyotime, P2078). 293T cells  
1489 were co-transfected with XZ201-HA-Creb-mCherry and pGL4.27-Phgdh-promoter  
1490 plasmids, crosslinked with 1% formaldehyde (Sigma) at 37°C for 10 min, followed by  
1491 the incubation with anti-CREB antibodies (Abway) or rabbit control IgG (CST) at 4°C  
1492 overnight. For the sample input, 1% of the sonicated precleared DNA was purified at  
1493 the same time with the precipitated immune complex. The ChIP samples were purified  
1494 by the Gel and PCR-clean up Kit (Nucleospin). The Creb-binding sequence was  
1495 amplified by the semi-quantitative PCR using primers specific for Phgdh promoter  
1496 region as listed in Table S2.

1497

### 1498 **In vivo treatment with the P2X7 antagonist of A-740003**

1499 To test the therapeutic effect of the P2X7 antagonist of A-740003 (TOCRIS) in vivo, a  
1500 total number of  $1 \times 10^6$  C1498 cells (a murine AML cell line) and THP-1 cells (a human  
1501 AML cell line) were transplanted into the C57BL/6 or NOD-SCID mice, respectively,  
1502 followed by the intraperitoneal administration of A-740003 (50 mg/kg) and DMSO 1  
1503 day after transplantation (every other day for 2 weeks). For the MLL-AF9-induced  
1504 murine leukemia model, a total number of  $1 \times 10^4$  WT and P2x7-KO AML cells with  
1505  $2 \times 10^5$  normal BM cells were co-transplanted into the lethally irradiated mice by  
1506 retroorbital injection, followed by the intraperitoneal administration of A-740003 (50  
1507 mg/kg) and DMSO 7 days after transplantation (every other day for 2 weeks). The  
1508 percentages of leukemia cells in the peripheral blood and the overall survival of  
1509 recipients were compared.

1510

1511 **Analyses for the ATP levels and the intracellular serine concentration**

1512 The BM of control mice transplanted with BM cells expressing an empty vector four  
1513 months after injection or AML mice was flushed out with 1 mL PBS and the supernatant  
1514 was collected for the measurement of ATP levels using ATP Bioluminescence Assay Kit  
1515 HS II (Roche) according to the manufacturer's protocol. In some cases, the bone  
1516 marrow fluid of healthy donors or AML patients (Table S4) was collected and ATP  
1517 levels were measured with ATP Bioluminescence Assay Kit HS II accordingly.  
1518 Intracellular serine measurement was performed as previously described (13). In brief,  
1519  $1 \times 10^6$  WT, P2x7-KO murine YFP<sup>+</sup> bulk AML cells, P2X7-knockdown human primary  
1520 AML cells were collected and processed for the measurement of serine levels using an  
1521 aTRAQ<sup>®</sup> assay kit (AB Sciex). The collected AML cells were dissolved in 40  $\mu$ L of  
1522 methanol, sonicated, and precipitated with 10  $\mu$ L of 10% sulfosalicylic acid and 400  
1523 mM norleucine. Then 10  $\mu$ L of supernatant was further mixed with 40  $\mu$ L of norvaline-  
1524 containing labeling buffer, and 10  $\mu$ L of the mixture was further mixed with 5  $\mu$ L  
1525 aTRAQ $\Delta$ 8 reagent, followed by the addition of 5  $\mu$ L of hydroxylamine, 32  $\mu$ L of  
1526 hydroxylamine and aTRAQ internal standard solution. The derivatized contents were  
1527 loaded onto 4000QTRAP LC-MS/MS linear (AB Sciex) using the Agilent 1200 LC  
1528 system. All data collection and processing were performed using Analyst 1.5.1 software  
1529 (AB Sciex).

1530

1531 **Western blotting**

1532 Cell lysates of FACS-purified WT, P2x7-KO Mac-1<sup>+</sup>c-Kit<sup>+</sup> LICs, bulk leukemia cells,  
1533 P2X7-knockdown THP-1 cells, U937 cells, MV4-11 cells, healthy donor BM cells or  
1534 human primary AML cells were electrophoresed on 10% SDS polyacrylamide gels and  
1535 transferred onto nitrocellulose membranes (Millipore). The membranes were blocked

1536 with 5% nonfat milk and then incubated with primary antibodies of anti-P2X7 (NOVUS,  
1537 NBP2-41300), anti-phospho-CREB (S133) (Abways, CY5043), anti-CREB (Abways,  
1538 CY5426), and anti-PHGDH (ABclonal, WH126491), followed by the incubation with  
1539 HRP-conjugated secondary antibodies. In some cases, relative protein levels were  
1540 quantified by measuring the signaling intensity and normalizing to the actin level by  
1541 using ImageJ software.

1542

#### 1543 **In silico analysis for clinical data**

1544 For the analysis of P2X7, CREB, PHGDH and CXCR4 expression in AML patients,  
1545 data were extracted from the curated GEPIA database (<http://gepia.cancer-pku.cn>). For  
1546 the analysis of P2Xs expression in AML patients, data were extracted from the TCGA  
1547 database (<https://www.cancer.gov/tcga>). For the analysis of the relationship between  
1548 the P2X7 expression levels and the overall survival of AML patients, the available  
1549 survival data from 150 patients were obtained from the OncoLnc  
1550 (<http://www.oncolnc.org/>). AML patients were subdivided into two subgroups  
1551 according to the low or high P2X7 expression levels and the overall survival were  
1552 compared between the P2X7-low and high subgroups.

1553

#### 1554 **Statistical analysis**

1555 Statistical analysis was performed using GraphPad software (Prism 7.0). Data are  
1556 represented as Mean  $\pm$  SD unless indicated elsewhere. All the experiments are  
1557 conducted independently for at least 3 times. Data were analyzed with a Student's t test  
1558 (two-tailed), one-way ANOVA with Tukey's multiple comparison test, or two-way  
1559 ANOVA with Sidak's multiple comparison test accordingly and statistical significance  
1560 was set at  $P < 0.05$  (\*,  $P < 0.05$ ; \*\*,  $P < 0.01$ ; \*\*\*,  $P < 0.001$ ).

1561 **Table S1. Limiting dilution assays for frequencies of WT and P2x7-KO LICs**

| Quantification of CRUs                 | Survival ratio |          |
|----------------------------------------|----------------|----------|
|                                        | WT             | KO       |
| Transplanted cells                     |                |          |
| 30                                     | 2/5            | 2/5      |
| 100                                    | 0/5            | 2/5      |
| 500                                    | 0/5            | 1/5      |
| Frequency of leukemia-initiating cells | 1:28           | 1:145    |
| 95% confidence interval                | (11-68)        | (62-341) |

1562

**Table S2. List of primers and shRNA target sequence**

| <b>Genotyping Primers</b> | <b>Sequences</b>        |
|---------------------------|-------------------------|
| <i>P2x7-JD581-F</i>       | ACTCACCCAGAGCAGAT       |
| <i>P2x7-JD581-R</i>       | TCCAGCCTTGATCTCC        |
| <b>q-PCR Primers</b>      | <b>Sequences</b>        |
| mouse <i>P2x1-F</i>       | ACTGGGAGTGTGACCTGGAC    |
| mouse <i>P2x1-R</i>       | TCCCAAACACCTTGAAGAGG    |
| mouse <i>P2x2-F</i>       | GCGTTCTGGGACTACGAGAC    |
| mouse <i>P2x2-R</i>       | CACTTTGTGTTCCGACATGG    |
| mouse <i>P2x3-F</i>       | AAAGCTGGACCATTGGGATCA   |
| mouse <i>P2x3-R</i>       | CGTGTCCCGCACTTGGTAG     |
| mouse <i>P2x4-F</i>       | GCGTCTGTGAAGACCTGTGA    |
| mouse <i>P2x4-R</i>       | GATTTGGCCAAGACGGAATA    |
| mouse <i>P2x5-F</i>       | GGGGTTCGTGTTGTCTCTGT    |
| mouse <i>P2x5-R</i>       | CACTCTGCAGGGAAGTGTC     |
| mouse <i>P2x6-F</i>       | GGGGTTTCTGGATTACAAGACG  |
| mouse <i>P2x6-R</i>       | CCTATCACGTAGACTACCACTGC |
| mouse <i>P2x7-F</i>       | TGTGTGCATTGACTTGCTCA    |
| mouse <i>P2x7-R</i>       | CTTGCAGACTTTTCCCAAGC    |
| mouse <i>Amt-F</i>        | CAGGCACAACCCTTGGTCC     |
| mouse <i>Amt-R</i>        | TGCAGGTGTGAATCAACATGAC  |
| mouse <i>Gatm-F</i>       | GCTTCCTCCCGAAATTCCTGT   |
| mouse <i>Gatm-R</i>       | CCTCTAAAGGGTCCCATTCGT   |
| mouse <i>Shmt1-F</i>      | CAGGGCTCTGTCTGATGCAC    |

|                        |                         |
|------------------------|-------------------------|
| mouse <i>Shmt1</i> -R  | CGTAACGCGCTCTTGTCAC     |
| mouse <i>Psph</i> -F   | AGGAAGCTCTTCTGTTTCAGCG  |
| mouse <i>Psph</i> -R   | GAGCCTCTGGACTTGATCCC    |
| mouse <i>Shmt2</i> -F  | TGGCAAGAGATACTACGGAGG   |
| mouse <i>Shmt2</i> -R  | GCAGGTCCAACCCCATGAT     |
| mouse <i>Gcat</i> -F   | GGACAGCGAACTGGAAGGG     |
| mouse <i>Gcat</i> -R   | AGTTATTGGCACAGAAGTTGAGG |
| mouse <i>Psat1</i> -F  | AAGCCACCAAGCAAGTGGTTA   |
| mouse <i>Psat1</i> -R  | GATGCCGAGTCCTCTGTAGTC   |
| mouse <i>Phgdh</i> -F  | ATGGCCTTCGCAAATCTGC     |
| mouse <i>Phgdh</i> -R  | AGTTCAGCTATCAGCTCCTCC   |
| mouse <i>Hoxa9</i> -F  | AAAACACCAGACGCTGGAAC    |
| mouse <i>Hoxa9</i> -R  | TCTTTTGCTCGGTCCTTGTT    |
| mouse <i>Bmi1</i> -F   | ATCCCCACTTAATGTGTGTCCT  |
| mouse <i>Bmi1</i> -R   | CTTGCTGGTCTCCAAGTAACG   |
| mouse <i>Camk1d</i> -F | ACTGGGGCCTTTTCTGAAGT    |
| mouse <i>Camk1d</i> -R | CCGATCGAAGAGTTCTCCAC    |
| mouse <i>Camk4</i> -F  | CTTCGAGGTGGAGTCAGAGC    |
| mouse <i>Camk4</i> -R  | TCAAGGACCAGGCTGATTTC    |
| mouse <i>Hoxb4</i> -F  | CGTGAGCACGGTAAACCCC     |
| mouse <i>Hoxb4</i> -R  | GTGTTGGGCAACTTGTGGTC    |
| mouse <i>Runx1</i> -F  | GATGGCACTCTGGTCACCG     |
| mouse <i>Runx1</i> -R  | GCCGCTCGGAAAAGGACAA     |
| mouse <i>Alox5</i> -F  | CTACGATGTCACCGTGGATG    |
| mouse <i>Alox5</i> -R  | GTGCTGCTTGAGGATGTGAA    |



|                                 |                         |
|---------------------------------|-------------------------|
| mouse <i>Arb2</i> -F            | AAGTCGAGCCCTAACTGCAA    |
| mouse <i>Arb2</i> -R            | GGAAAGACAGGCCCAGTACA    |
| mouse <i>Creb</i> -F            | AGCAGCTCATGCAACATCATC   |
| mouse <i>Creb</i> -R            | AGTCCTTACAGGAAGACTGAACT |
| mouse <i>Cxcr4</i> -F           | GACTGGCATAGTCGGCAATG    |
| mouse <i>Cxcr4</i> -R           | AGAAGGGGAGTGTGATGACAAA  |
| mouse <i>CD44</i> -F            | CACCATTGCCTCAACTGTGC    |
| mouse <i>CD44</i> -R            | TTGTGGGCTCCTGAGTCTGA    |
| mouse <i>CD82</i> -F            | TTCGGGGTGTGGATTCTTGC    |
| mouse <i>CD82</i> -R            | AGGAAGCCCATCACTATGGTG   |
| mouse <i>Selplg</i> -F          | GAAAGGGCTGATTGTGACCCC   |
| mouse <i>Selplg</i> -R          | AGTAGTTCCGCACTGGGTACA   |
| mouse <i>Panx1</i> -F           | GCTGCACAAGTTCTTCCCCTA   |
| mouse <i>Panx1</i> -R           | CGCGGTTGTAGACTTTGTCAAG  |
| mouse <i>Cx43</i> -F            | GGATCGCGTGAAGGGAAGAAG   |
| mouse <i>Cx43</i> -R            | TTGCGGCAGGAGGAATTGTTT   |
| mouse $\beta$ - <i>actin</i> -F | GGCTGTATTCCCCTCCATCG    |
| mouse $\beta$ - <i>actin</i> -R | CCAGTTGGTAACAATGCCATGT  |
| human P2X7-F                    | AAGCTGTACCAGCGGAAAGA    |
| human P2X7-R                    | GCTCTTGGCCTTCTGTTTTG    |
| human ACTIN-F                   | AGAGCTACGAGCTGCCTGAC    |
| human ACTIN-R                   | AGCACTGTGTTGGCGTACAG    |

---

| shRNAs          | Target sequences      |
|-----------------|-----------------------|
| Scramble        | CCTAAGGTTAAGTCGCCCTCG |
| mouse shP2x7-#1 | CCCGGCTACAACCTCAGATAT |

|                        |                         |
|------------------------|-------------------------|
| <b>mouse shP2x7-#2</b> | GCCACAACCTATAACCACGAGAA |
| <b>human shP2X7-#1</b> | CCGAGAAACAGGCGATAATTT   |
| <b>human shP2X7-#2</b> | GCATGAATTATGGCACCATTA   |

---

**Cloning Primers**
**Sequences**


---

|                                   |                                    |
|-----------------------------------|------------------------------------|
| <b>mouse <i>Creb</i>-XhoI-F</b>   | CCGCTCGAGCCAGCAGCTCATGCAAC         |
| <b>mouse <i>Creb</i>-EcoRI-R</b>  | CCGGAATTCTTAATCTGATTTGTGGCAGT      |
| <b>mouse <i>Phgdh</i>-BamHI-F</b> | CGCGGATCCGATCCATGGCCTTCGCAAATCTG   |
| <b>mouse <i>Phgdh</i>-NotI-R</b>  | ATAAGAATGCGGCCGCTCAGAAGCAGAACTGGAA |

---

**Luciferase primers**
**Sequences**


---

|                                      |                                |
|--------------------------------------|--------------------------------|
| <b>mouse <i>Phgdh</i>-promoter-F</b> | CCGCTCGAGAGCGCAAAGGTACGACGACCT |
| <b>mouse <i>Phgdh</i>-promoter-R</b> | CCGGAATTCTTACATGTAGTGCCACTGCC  |
| <b><i>Phgdh</i>-F (for ChIP)</b>     | GCTTTACTTCTCACTGTG             |
| <b><i>Phgdh</i>-R (for ChIP)</b>     | TCCTTCCTTCCCTTCTC              |

---

1565 **Table S3. AML patient samples used for functional analysis**

| <b>Sample</b> | <b>Age</b> | <b>Gender</b> | <b>Cytogenetics</b>    | <b>Subtype</b> | <b>Survival (month)</b> |
|---------------|------------|---------------|------------------------|----------------|-------------------------|
| AML #1        | 73         | Female        | 47, XX, 8[6]/46, XX    | M5             | Alive                   |
| AML #2        | 36         | Female        | 46, XX, MLL-AF9 fusion | M5             | Alive                   |
| AML #3        | 62         | Male          | Normal karyotype M2    | M2             | 15                      |

1566

1567 **Table S4. AML patient samples used for ATP level detection**

| Sample  | Age | Gender | Cytogenetics                   | Subtype      | Survival (month) |
|---------|-----|--------|--------------------------------|--------------|------------------|
| AML #4  | 50  | Male   | 46, XY, FLT3-ITD <sup>+</sup>  | M4           | Alive            |
| AML #5  | 54  | Female | 46, XX                         | M4           | Alive            |
| AML #6  | 32  | Male   | 46, XY, t (15;17) (q24; q21)   | M3           | Alive            |
| AML #7  | 41  | Male   | 46, XY                         | Unclassified | Alive            |
| AML #8  | 21  | Female | 46, XY, t (15;17) (q24; q21)   | M3           | Alive            |
| AML #9  | 59  | Male   | 46, XY                         | M4           | Alive            |
| AML #10 | 67  | Female | 46, XX                         | M4           | Alive            |
| AML #11 | 62  | Male   | 46, XY                         | Unclassified | Alive            |
| AML #12 | 67  | Female | 46, XX                         | M4           | Alive            |
| AML #13 | 30  | Female | 46, XX                         | M4           | alive            |
| AML #14 | 20  | Male   | 46, XY, FLT3-ITD <sup>+</sup>  | M5           | Alive            |
| AML #15 | 68  | Male   | 46, XY                         | Unclassified | Alive            |
| AML #16 | 59  | Male   | 46, XY                         | M2           | Alive            |
| AML #17 | 57  | Male   | 46, XY                         | M5           | Alive            |
| AML #18 | 57  | Male   | 46, XY                         | Unclassified | Alive            |
| AML #19 | 81  | Male   | Unknown                        | M2           | 3.2              |
| AML #20 | 32  | Female | 46, XX, t (15;17) (q22; q31)   | M3           | Alive            |
| AML #21 | 54  | Male   | 46, XY                         | M5           | Alive            |
| AML #22 | 71  | Male   | 46, XY, t (16;16) (p13.1; q22) | M4           | 0.2              |
| AML #23 | 64  | Female | 45, XX [7]/46, XX [13]         | Unclassified | Alive            |
| AML #24 | 36  | Female | 46, XX                         | Unclassified | Alive            |
| AML #25 | 54  | Female | 46, XX                         | M4           | 13               |
| AML #26 | 46  | Female | 46, XX                         | M4           | Alive            |
| AML #27 | 67  | Male   | 46, XY                         | M5           | 9                |
| AML #28 | 34  | Male   | 46, XY, t (8;21) (q22; q22)    | M2           | 202              |

|         |    |        |                                              |              |       |
|---------|----|--------|----------------------------------------------|--------------|-------|
| AML #29 | 34 | Male   | 46, XY                                       | M2           | Alive |
| AML #30 | 20 | Male   | 46, XY, FLT3-ITD <sup>+</sup>                | M5           | Alive |
| AML #31 | 55 | Male   | 46, XY                                       | Unclassified | Alive |
| AML #32 | 26 | Male   | 46, XY                                       | Unclassified | Alive |
| AML #33 | 56 | Female | 46, XX, WT1 <sup>+</sup> , FLT3 <sup>+</sup> | M5           | Alive |
| AML #34 | 57 | Male   | 46, XY                                       | Unclassified | Alive |

---

1568

**Table S5. List of antibodies for flow cytometric analysis**

| <b>Antibodies</b>                   | <b>Source</b>            | <b>Catalog Number</b> |
|-------------------------------------|--------------------------|-----------------------|
| Anti-mouse c-Kit-APC                | eBioscience              | 17-1171-82            |
| Anti-Mouse-Sca-1-FITC               | eBioscience              | 130-102-831           |
| Anti-mouse Gr-1-PE                  | eBioscience              | 12-5931-83            |
| Anti-mouse Mac-1-APC                | eBioscience              | 17-0112-83            |
| Anti-mouse CD34-PE                  | eBioscience              | 12-0349-42            |
| Anti-mouse Sca-1-PEcy7              | eBioscience              | 25-5981-82            |
| Anti-mouse CD16/32-eFlour 450       | eBioscience              | 48-0161-82            |
| Streptavidin PerCP-Cyanine5.5       | eBioscience              | 45-4317-82            |
| Anti-mouse Gr-1- Biotin             | eBioscience              | 13-5931-85            |
| Anti-mouse CD127-Biotin             | eBioscience              | 13-1271-82            |
| Anti-mouse Ter 119-Biotin           | eBioscience              | 13-5921-85            |
| Anti-mouse Cxcr4-Biotin             | eBioscience              | 13-9991-82            |
| Anti-mouse CD3e Biotin              | eBioscience              | 13-0031-85            |
| Anti-mouse CD45R(B220)-Biotin       | Thermo Fisher Scientific | 13-0452-85            |
| Anti-mouse CD3e-APC                 | eBioscience              | 17-0031-82            |
| Anti-Mouse-B220-PE                  | eBioscience              | 12-0452-85            |
| Anti-Mouse-CD45.2-APC               | eBioscience              | 17-0454-82            |
| Anti-Mouse-CD45.1-PE                | eBioscience              | 12-0453-82            |
| Anti-Human-CD34-FITC                | eBioscience              | 11-0349               |
| Anti-Human-CD33-PE                  | Mitenyi                  | 130-098-896           |
| Anti-Human-CD45RA-PE                | eBioscience              | 85-12-0458-42         |
| Anti-Human-CD19-PE                  | Mitenyi                  | 130-098-068           |
| PE Mouse Anti-Human Ki-67 Set       | BD Pharmingen            | BD556027              |
| AnnexinV-PE Apoptosis Detection Kit | BD Pharmingen            | BD559763              |
